# Supplementary material for: Consumer Attitudes Towards Deprescribing: A Systematic Review and Meta-Analysis
Source: PubMed Central journal article supplement — J Gerontol A Biol Sci Med Sci. 2021 Aug 14;77(5):1020–34. doi: 10.1093/gerona/glab222 (PMC9071395; doi:10.1093/gerona/glab222), 2021-08-14
Supplement: glab222_suppl_supplemental_material.pdf [file glab222_suppl_supplemental_material.pdf]

## Supplemental content

eTable 1. Study and patient characteristics

eTable 2. Process of translation

eTable 3. Medication-specific questions in adapted (r)PATD questionnaires

eTable 4. Quality assessment of studies using the SURGE checklist

eTable 5. Quality assessment summary using the SURGE checklist according to checklist items

eTable 6. Caregivers' results from the rPATD questionnaire

eTable 7. Patients: Associations with the primary outcome question "If my doctor said it was possible, I would be willing to stop one or more of my regular medicines"

eTable 8. Caregivers: Associations with the primary outcome question "If their doctor said it was possible I would be willing to stop one or more of my care recipient's medicines"

eFigure 1. PRISMA Flow diagram of included articles

eFigure 2. Subgroup analyses of proportion of patients who agreed or strongly agreed with the question "If my doctor said it was possible, I would be willing to stop one or more of my medicines"

eFigure 3. Funnel plots of patients, caregivers, and sample size

**eTable 1. Study and patient characteristics**

| Source, year, country                                         | No. of chronic conditions (median) | How conditions were collected | How medications were collected | Medications self-managed (%) | Greater than high school level of education (%) | Living situation (%)                                      | Questionnaire administered by, where                   | Additional validated tools/questions used                                                                                                                           |
|---------------------------------------------------------------|------------------------------------|-------------------------------|--------------------------------|------------------------------|-------------------------------------------------|-----------------------------------------------------------|--------------------------------------------------------|---------------------------------------------------------------------------------------------------------------------------------------------------------------------|
| <b>PATD questionnaire</b>                                     |                                    |                               |                                |                              |                                                 |                                                           |                                                        |                                                                                                                                                                     |
| <b>Anderson <i>et al</i>, 2020,<sup>1,2</sup> Australia</b>   | 5                                  | Medical records               | Medical records                | 90                           | NR                                              | Home, alone: 32                                           | Researcher administered at patient's home or by phone  | -                                                                                                                                                                   |
| <b>Aoki <i>et al</i>, 2019,<sup>3</sup> Japan</b>             | NR                                 | Self-report                   | Self-report                    | NR                           | NR                                              | NR                                                        | Self-administered at patient's home, online or by post | Short Form Health Survey, Physical Health Composite Scale score, Mental Health Composite Scale score                                                                |
| <b>Candela <i>et al</i>, 2019 (thesis),<sup>4</sup> Spain</b> | 2                                  | Medical records               | Medical records                | NR                           | NR                                              | NR                                                        | Researcher administered at an outpatient clinic        | Simplified Medication Adherence Questionnaire                                                                                                                       |
| <b>Cross <i>et al</i>, 2020,<sup>5</sup> Australia</b>        | NR                                 | -                             | Self-report + medical record   | NR                           | 20 <sup>b</sup>                                 | Home, alone: 22<br>Home with companion/partner/family: 78 | Researcher administered at patient's home or by phone  | Medication Regimen Complexity Index, PIMcogs, Drug Burden Index score, Tool for Adherence Behaviour Screening, Quality of life EQ-5D, Mini-Mental State Examination |
| <b>Frankowski <i>et al</i>, 2019,<sup>6</sup> Netherlands</b> | NR                                 | -                             | Medical record                 | NR                           | NR                                              | Residential psychiatric facility: 100                     | Researcher administered                                | Psychiatric diagnosis, health priorities                                                                                                                            |
| <b>Galazzi <i>et al</i>, 2016,<sup>7</sup> Italy</b>          | 4                                  | Medical records               | Medical records                | NR                           | NR                                              | Home, alone: 24<br>Home, with caregiver: 74               | Self-administered                                      | -                                                                                                                                                                   |

|                                                       |                                |                 |                 |     |                 |                                                                                                         |                                                             |                                                                                                                                                                                                         |
|-------------------------------------------------------|--------------------------------|-----------------|-----------------|-----|-----------------|---------------------------------------------------------------------------------------------------------|-------------------------------------------------------------|---------------------------------------------------------------------------------------------------------------------------------------------------------------------------------------------------------|
|                                                       |                                |                 |                 |     |                 | Nursing home: 2                                                                                         | with help at hospital                                       |                                                                                                                                                                                                         |
| <b>Gillespie et al, 2019,<sup>8</sup> Australia</b>   | 3                              | Self-report     | Self-report     | NR  | 21              | NR                                                                                                      | Self-administered at patient's home                         | All Aspects of Health Literacy Scale 10 items, Canadian Survey of Experiences with Primary Health Care 3 items                                                                                          |
| <b>Goulding unpublished,<sup>9</sup> USA</b>          | NR                             | -               | Medical records | 0   | NR              | NR                                                                                                      | Self-administered at patient's home or pharmacy             | -                                                                                                                                                                                                       |
| <b>Hao et al, 2018,<sup>10</sup> Malaysia</b>         | NR                             | -               | NR              | NR  | 11              | NR                                                                                                      | NR                                                          | -                                                                                                                                                                                                       |
| <b>Hendrix et al, 2019,<sup>11</sup> Australia</b>    | 2 (Charlson Comorbidity Index) | Medical records | Medical records | NR  | NR              | NR                                                                                                      | Researcher administered at a residential aged care facility | Activities of daily living Katz index, Neuropsychiatric Inventory Nursing Home version, Dementia Severity Rating Scale, FRAIL-NH scale, Charlson Comorbidity Index, Medication Regimen Complexity Index |
| <b>Kalogianis et al, 2016,<sup>12</sup> Australia</b> | NR                             | Medical records | Medical records | NR  | NR              | NR                                                                                                      | Researcher administered at a residential aged care facility | Quality of Life in Alzheimer's Disease Scale (staff informant version)                                                                                                                                  |
| <b>Ng et al, 2017,<sup>13</sup> Singapore</b>         | 7 <sup>b</sup>                 | Medical records | Medical records | -   | -               | Home, alone: 8<br>Home with domestic helper/nurse: 2<br>Living with family: 89<br>Living with others: 2 | Researcher administered at an outpatient healthcare centre  | Wake Forest Physician Trust Scale                                                                                                                                                                       |
| <b>Qi et al, 2015,<sup>14</sup> Australia</b>         | 2                              | Medical records | Medical records | NR  | 86 <sup>c</sup> | NR                                                                                                      | Researcher administered at hospital                         | Edmonton Frail Scale, Mini-Mental State Examination                                                                                                                                                     |
| <b>Reeve et al, 2014</b>                              | 3                              | Self-report     | Self-report     | 100 |                 | NR                                                                                                      | Researcher                                                  | -                                                                                                                                                                                                       |

|                                                                                  |    |                              |                              |    |    |                 |                                                                   |                                                                                                                                                                                                                 |
|----------------------------------------------------------------------------------|----|------------------------------|------------------------------|----|----|-----------------|-------------------------------------------------------------------|-----------------------------------------------------------------------------------------------------------------------------------------------------------------------------------------------------------------|
| <b>(thesis)<sup>15,d</sup>, Australia</b>                                        |    |                              |                              |    |    |                 | administered at a pharmacy                                        |                                                                                                                                                                                                                 |
| <b>Reeve et al, 2013 (PATD development + results),<sup>16,17</sup> Australia</b> | 6  | Self-report + medical record | Self-report + medical record | 82 | 74 | NR              | Researcher administered at hospital                               | Beliefs about Medicines Questionnaire Specific, Mini-Mental State Examination score, Geriatric Depression Scale score, Morisky Medication Adherence Score, Drug Burden Index, Wake Forest Physician Trust scale |
| <b>Saraswathy et al, 2018,<sup>18,e</sup> India</b>                              | NR | NR                           | NR                           | NR | NR | NR              | -                                                                 | -                                                                                                                                                                                                               |
| <b>Schiøtz et al, 2018,<sup>19</sup> Denmark</b>                                 | 6  | Medical records              | Self-report                  | NR | 37 | Home, alone: 69 | Self-administered with help available at an outpatient clinic     | The Australian Health Literacy Questionnaire 4 items, self-rated health question                                                                                                                                |
| <b>Sirois et al, 2017,<sup>20</sup> Canada</b>                                   | NR | -                            | Self-report                  | 89 |    | NR              | Self-administered at patient's home, pharmacy or community centre | -                                                                                                                                                                                                               |
| <b>Turner et al, 2018,<sup>21</sup> Canada</b>                                   | NR | -                            | Medical record               | NR | 45 | NR              | NR, administered at patient's home or by phone                    | Beliefs about Medicines Questionnaire Specific, Self-reported fair/poor health, Mini-Mental State Examination, Frailty (VES-13 $\geq$ 3)                                                                        |
| <b>ul Haq et al, 2016,<sup>22,e</sup> Pakistan</b>                               | NR | -                            | NR                           | NR | NR | NR              | Self-administered                                                 | -                                                                                                                                                                                                               |

|                                                                |                                |             |                              |    |    |                                              |                                                     |                                                                                                                                                   |
|----------------------------------------------------------------|--------------------------------|-------------|------------------------------|----|----|----------------------------------------------|-----------------------------------------------------|---------------------------------------------------------------------------------------------------------------------------------------------------|
|                                                                |                                |             |                              |    |    |                                              | with help available                                 |                                                                                                                                                   |
| <b>Van Marum <i>et al</i>, 2016,<sup>23</sup> Netherlands</b>  | NR                             | -           | Self-report + medical record | NR | NR | Home ("independent"): 73<br>Nursing home: 28 | Researcher administered                             | -                                                                                                                                                 |
| <b>Whitty <i>et al</i>, 2018,<sup>24</sup> Canada</b>          | NR                             | -           | Medical record               | NR | NR | NR                                           | NR                                                  | Beliefs about Medicines Questionnaire, Edmonton Symptom Assessment System (revised), Clinical Frailty Score                                       |
| <b>rPATD, rPATDcog questionnaires</b>                          |                                |             |                              |    |    |                                              |                                                     |                                                                                                                                                   |
| <b>Cardwell <i>et al</i>, 2020,<sup>25</sup> Ireland</b>       | NR                             | NR          | Medical record               | NR | 34 | NR                                           | Self-administered with help available, NR           | Quality of life (EQ-5D-5L), Visual Analogue Scale, Multimorbidity Treatment Burden Questionnaire                                                  |
| <b>Edelman <i>et al</i>, 2019,<sup>26,27</sup> Netherlands</b> | NR                             | Self-report | Self-report                  | NR | NR | NR                                           | Self-administered at patient's home                 | International Prostate Symptom Index, Overactive Bladder questionnaire                                                                            |
| <b>Gnjidic <i>et al</i>, 2019,<sup>28</sup> Australia</b>      | 2 (Charlson Comorbidity Index) | Self-report | Medical records              | NR | 38 | NR                                           | NR, administered at hospital                        | Charlson Comorbidity Index, Mini-Mental State Examination, Reported Edmonton Frail Scale, Control Preference Scale, Single Item Literacy Screener |
| <b>Ikeji <i>et al</i>, 2019,<sup>29,30</sup> USA</b>           | NR                             | -           | Self-report                  | 87 | NR | NR                                           | Self-administered at an outpatient geriatric clinic | -                                                                                                                                                 |
| <b>Kua C-H <i>et al</i>,</b>                                   | 5                              | Self-report | Self-report                  | NR | 29 | Home with                                    | Self-                                               | -                                                                                                                                                 |

|                                                                                          |                |                 |                 |                                       |    |                                                 |                                                                          |                                                                                                                             |
|------------------------------------------------------------------------------------------|----------------|-----------------|-----------------|---------------------------------------|----|-------------------------------------------------|--------------------------------------------------------------------------|-----------------------------------------------------------------------------------------------------------------------------|
| <b>2020,<sup>31</sup> Singapore</b>                                                      |                |                 |                 |                                       |    | companion/partner/family:<br>86                 | administered at hospitals, community pharmacies and primary care clinics |                                                                                                                             |
| <b>Kua K <i>et al</i>, 2019,<sup>32-34</sup> Malaysia</b>                                | NR             | -               | NR              | 91 (health clinic)<br>74 (pharmacies) | 10 | Home, alone: 10<br>Home with family/friends: 90 | Self-administered at community pharmacies and primary care clinics       | -                                                                                                                           |
| <b>Lundby <i>et al</i>, 2019,<sup>35,e</sup> Denmark</b>                                 | NR             | NR              | NR              | NR                                    | NR | NR                                              | NR, at a residential aged care facility                                  | -                                                                                                                           |
| <b>Major <i>et al</i>, 2019,<sup>36,f</sup> Australia</b>                                | NR             | -               | NR              | NR                                    | NR | NR                                              | Self-administered with help available at patient's home                  | -                                                                                                                           |
| <b>Martinez <i>et al</i>, 2020,<sup>37</sup> USA</b>                                     | NR             | Medical records | Medical record  |                                       | 73 | NR                                              | Self-administered, NR                                                    | -                                                                                                                           |
| <b>Ng <i>et al</i>, 2019,<sup>38,e</sup> Malaysia</b>                                    | NR             | NR              | Self-report     | NR                                    | NR | NR                                              | NR, at a public health talk                                              | -                                                                                                                           |
| <b>Nusair <i>et al</i>, 2020,<sup>39</sup> Jordan</b>                                    | 4 <sup>b</sup> | NR              | NR              | NR                                    | 25 | NR                                              | NR                                                                       | -                                                                                                                           |
| <b>Omar <i>et al</i>, 2019,<sup>40</sup> Malaysia</b>                                    | 3              | Self-report     | Self-report     |                                       | 17 | NR                                              | NR                                                                       | -                                                                                                                           |
| <b>Paque <i>et al</i>, 2019,<sup>41</sup> Belgium</b>                                    | NR             | NR              | Medical records | NR                                    | 15 | NR                                              | Researcher administered at a residential aged care facility              | Activities of daily living Katz index, Mini Mental State Examination, Minimum Data Set Mortality Risk Index                 |
| <b>Reeve <i>et al</i>, 2019 (rPATD development + results),<sup>42,43</sup> Australia</b> | NR             | Self-report     | Self-report     | 92                                    | 74 | NR                                              | Self-administered at patient's home                                      | Self-rated health, abbreviated Wake Forest Trust in Physician Scale, Patient Autonomy Index and the Beliefs about Medicines |

|                                                                 |                |                                  |                                  |    |    |                                                                                           |                                                   | Questionnaire              |
|-----------------------------------------------------------------|----------------|----------------------------------|----------------------------------|----|----|-------------------------------------------------------------------------------------------|---------------------------------------------------|----------------------------|
| <b>Reeve et al, 2018,<sup>44,g</sup><br/>USA</b>                | NR             | -                                | Medical records                  | NR | 57 | NR                                                                                        | Self-administered at patient's home               | -                          |
| <b>Reeve et al, 2018 (rPATDcog),<sup>45</sup><br/>Australia</b> | 3 <sup>b</sup> | Medical records and/or interview | Medical records and/or interview | 67 | 29 | Home, alone: 24<br>Home with carer/family/friend: 62<br>Retirement village: 5<br>RACF: 10 | Researcher administered, NR                       | Goals of care questions    |
| <b>Scott et al, 2019,<sup>34</sup><br/>UK</b>                   | NR             | Self-report                      | Self-report                      | NR | NR | NR                                                                                        | Self-administered with help available at hospital | -                          |
| <b>Tegegn et al, 2018,<sup>46</sup><br/>Ethiopia</b>            | 2 (CCI)        | NR                               | NR                               | NR | 6  | NR                                                                                        | Researcher administered, NR                       | Charlson Comorbidity Index |

<sup>a</sup> Completed high school or higher education

<sup>b</sup> Mean

<sup>c</sup> Secondary or above

<sup>d</sup> This reference contains results from two cohorts; one of these cohorts was published separately (and so are reported separately: Reeve 2013). Data presented here is from the second cohort only (community pharmacy participants)

<sup>e</sup> This is an abstract

<sup>f</sup> This is an editorial comment

<sup>g</sup> Combined PATD and rPATD questions, for clarity we have classified this reference as using the rPATD questionnaire

**eTable 2. Process of translation**

| Source                                                         | Language         | Forward-back translation (Y/N) | Pilot testing (Y/N) | Other description                                                                                                                                                                                                                         |
|----------------------------------------------------------------|------------------|--------------------------------|---------------------|-------------------------------------------------------------------------------------------------------------------------------------------------------------------------------------------------------------------------------------------|
| <b>PATD questionnaire</b>                                      |                  |                                |                     |                                                                                                                                                                                                                                           |
| <b>Candela <i>et al</i>, 2019 (thesis),<sup>4</sup> Spain</b>  | Spanish          | N                              | N                   | Researcher translated the PATD                                                                                                                                                                                                            |
| <b>Frankowski <i>et al</i>, 2019,<sup>6</sup> Netherlands</b>  | Dutch            | NR                             | NR                  | Noted to use Dutch translation from van Marum <i>et al</i> , 2016                                                                                                                                                                         |
| <b>Galazzi <i>et al</i>, 2016,<sup>7</sup> Italy</b>           | Italian          | Y                              | Y                   | Pilot tested with 5 patients                                                                                                                                                                                                              |
| <b>Schiøtz <i>et al</i>, 2018,<sup>19</sup> Denmark</b>        | Danish           | Y                              | Y                   | Pilot tested with 5 patients                                                                                                                                                                                                              |
| <b>Sirois <i>et al</i>, 2017,<sup>20</sup> Canada</b>          | French           | N                              | N                   | Two people independently translated and reached consensus on the final version                                                                                                                                                            |
| <b>Van Marum <i>et al</i>, 2016,<sup>23</sup> Netherlands</b>  | Dutch            | Y                              | Y                   | Pilot tested with 5 patients                                                                                                                                                                                                              |
| <b>rPATD questionnaire</b>                                     |                  |                                |                     |                                                                                                                                                                                                                                           |
| <b>Edelman <i>et al</i>, 2019,<sup>26,27</sup> Netherlands</b> | Dutch            | NR                             | NR                  | Translated and linguistically validated using the World Health Organisation guideline 'Process of translation and adaptation of instruments'                                                                                              |
| <b>Kua <i>et al</i>, 2019,<sup>32-34</sup> Malaysia</b>        | Mandarin & Malay | Y                              | Y                   | Pilot tested with 10 older patients                                                                                                                                                                                                       |
| <b>Lundby <i>et al</i>, 2019,<sup>35,a</sup> Denmark</b>       | Danish           | Y                              | Y                   | Translated and culturally adapted during five stages of forward and backward translation. The prefinal questionnaire was pilot tested through semi-structured interviews with 11 RACF residents                                           |
| <b>Nusair <i>et al</i>, 2020,<sup>39</sup> Jordan</b>          | Arabic           | Y                              | Y                   | Pilot tested with 28 patients. Internal consistency and test-retest reliability. Validity was assessed through face validity and construct validity. Followed ISPOR's Principles of Good Practice for Translation and Cultural Adaptation |
| <b>Omar <i>et al</i>, 2019,<sup>40</sup> Malaysia</b>          | Malay            | Y                              | Y                   | Translation was confirmed by two pharmacists and one language expert. A pilot study was conducted with 20 older patients                                                                                                                  |
| <b>Paque <i>et al</i>, 2019,<sup>41</sup> Belgium</b>          | Dutch            | Y                              | N                   | Forward and backward translation                                                                                                                                                                                                          |
| <b>Tegegn <i>et al</i>, 2018,<sup>46</sup> Ethiopia</b>        | Amharic          | Y                              | Y                   | Pilot tested with 25 older patients                                                                                                                                                                                                       |

Y = yes

N = no

NR = not reported

<sup>a</sup> This is an abstract



**eTable 3. Medication-specific questions in adapted (r)PATD questionnaires**

| Study<br>Drug class<br>Description                                                                                                                                                                                                                                 | Questions                                                                                                                                                                                                                                                                                                                                                                                                                                               | AGREE<br>%<br>Strongly<br>agree +<br>agree |
|--------------------------------------------------------------------------------------------------------------------------------------------------------------------------------------------------------------------------------------------------------------------|---------------------------------------------------------------------------------------------------------------------------------------------------------------------------------------------------------------------------------------------------------------------------------------------------------------------------------------------------------------------------------------------------------------------------------------------------------|--------------------------------------------|
| <b>Qi et al, 2015:</b> <sup>14</sup><br>Statins<br>Questions used in addition to<br>the PATD questionnaire                                                                                                                                                         | Q11: I will continue taking the statin for as long as my doctor tells me I need to                                                                                                                                                                                                                                                                                                                                                                      | 98                                         |
|                                                                                                                                                                                                                                                                    | Q12: I am concerned about the potential side-effects of taking the statin                                                                                                                                                                                                                                                                                                                                                                               | 94                                         |
|                                                                                                                                                                                                                                                                    | Q13: I trust my doctor to tell me if I should stop taking the statin                                                                                                                                                                                                                                                                                                                                                                                    | 95                                         |
|                                                                                                                                                                                                                                                                    | Q14: If my doctor said it was possible, I would stop taking the statin                                                                                                                                                                                                                                                                                                                                                                                  | 95                                         |
|                                                                                                                                                                                                                                                                    | Q15: Recently heard negative information regarding statins (yes)                                                                                                                                                                                                                                                                                                                                                                                        | 37                                         |
| <b>Edelman et al, 2019:</b> <sup>26,27</sup><br>Alpha-blockers<br>Questions in the<br>'appropriateness' and<br>'concerns about stopping'<br>factors of the rPATD<br>questionnaire were amended<br>by changing the word<br>'medicines' to 'alpha-blocker'           | Appropriateness: <sup>a</sup><br>I would like to try stopping the alpha-blocker to see how I feel without it<br>I would like my doctor to reduce the dose of the alpha-blocker<br>I feel that I may be taking the alpha-blocker that I no longer need<br>I believe the alpha-blocker may be currently giving me side effects<br>I think the alpha-blocker may not be working                                                                            | 44                                         |
|                                                                                                                                                                                                                                                                    | Concerns about stopping:<br>I have had a bad experience when stopping the alpha-blocker before<br>I would be reluctant to stop the alpha-blocker that I had been taking for a long time<br>If the alpha-blocker was stopped I would be worried about missing out on future benefits<br>I get stressed whenever changes are made to my alpha-blocker<br>If my doctor recommended stopping the alpha-blocker I would feel that he/she was giving up on me | 7                                          |
| <b>Gnjidic et al, 2019:</b> <sup>28</sup><br>Benzodiazepines<br>Questions used in addition to<br>the rPATD questionnaire                                                                                                                                           | I will continue taking the benzodiazepine for as long as my doctor tells me I need to                                                                                                                                                                                                                                                                                                                                                                   | 71                                         |
|                                                                                                                                                                                                                                                                    | I am concerned about the potential side effects of taking benzodiazepine                                                                                                                                                                                                                                                                                                                                                                                | 19                                         |
|                                                                                                                                                                                                                                                                    | I trust my doctor to tell me if I should stop taking the benzodiazepine                                                                                                                                                                                                                                                                                                                                                                                 | 95                                         |
|                                                                                                                                                                                                                                                                    | If my doctor said it was possible, I would stop taking the benzodiazepine                                                                                                                                                                                                                                                                                                                                                                               | 95                                         |
|                                                                                                                                                                                                                                                                    | I believe that the benzodiazepine is effective in treating my symptoms                                                                                                                                                                                                                                                                                                                                                                                  | 86                                         |
| <b>Ikeji et al, 2019:</b> <sup>29,30</sup><br>Proton Pump Inhibitors<br>(PPIs)<br>Questions were amended by<br>changing the word 'medicines'<br>to 'PPIs'. Except the primary<br>outcome (Q7) was asked with<br>both 'PPIs' and 'medicines'<br>rPATD questionnaire | Q2. I'd like to be involved in making decisions about my PPI with my doctor                                                                                                                                                                                                                                                                                                                                                                             | 89                                         |
|                                                                                                                                                                                                                                                                    | Q3. I have a good understanding of the reason I was prescribed PPI                                                                                                                                                                                                                                                                                                                                                                                      | 89                                         |
|                                                                                                                                                                                                                                                                    | Q7. If my doctor said it was possible, I would be willing to stop my PPI                                                                                                                                                                                                                                                                                                                                                                                | 84                                         |
|                                                                                                                                                                                                                                                                    | Q13. I would like to try stopping my PPI to see how I feel without it                                                                                                                                                                                                                                                                                                                                                                                   | 58                                         |
|                                                                                                                                                                                                                                                                    | Q14. I would like my doctor to reduce the dose of my PPI                                                                                                                                                                                                                                                                                                                                                                                                | 47                                         |
|                                                                                                                                                                                                                                                                    | Q16. I believe my PPI may be giving side effects                                                                                                                                                                                                                                                                                                                                                                                                        | 0                                          |
|                                                                                                                                                                                                                                                                    | Q17. I think my PPI may not be working                                                                                                                                                                                                                                                                                                                                                                                                                  | 32                                         |
|                                                                                                                                                                                                                                                                    | Q18. I have had a bad experience when stopping my PPI                                                                                                                                                                                                                                                                                                                                                                                                   | 32                                         |
|                                                                                                                                                                                                                                                                    | Q19. I would be reluctant to stop my PPI                                                                                                                                                                                                                                                                                                                                                                                                                | 47                                         |
|                                                                                                                                                                                                                                                                    | Q21. I get stressed whenever changes are made to my PPI                                                                                                                                                                                                                                                                                                                                                                                                 | 5                                          |
| Q22. If my doctor recommended stopping my PPI I would feel that they were giving up on me                                                                                                                                                                          | 33                                                                                                                                                                                                                                                                                                                                                                                                                                                      |                                            |

<sup>a</sup> Alpha-blocker-specific rPATD factor were categorised into 'disagree' (mean factor score, 1.0–2.4), 'neutral' (2.5–3.5), and 'agree' (3.6–5.0). The results were then expressed as percentages

**eTable 4. Quality assessment of studies using the SURGE checklist (n = 38)<sup>a</sup>**

|                                                                         | Background (2)                               | Methods (15) | Results (5) | Discussion (3) | Ethics & Disclosure (3) | TOTAL (26) |
|-------------------------------------------------------------------------|----------------------------------------------|--------------|-------------|----------------|-------------------------|------------|
| <b>PATD questionnaire</b>                                               | <b>Yes &amp; Partially N (%)<sup>b</sup></b> |              |             |                |                         |            |
| Anderson <i>et al</i> , 2020 <sup>1,2</sup>                             | 2 (100)                                      | 9 (69)       | 4 (100)     | 3 (100)        | 3 (100)                 | 21 (84)    |
| Aoki <i>et al</i> , 2019 <sup>3</sup>                                   | 2 (100)                                      | 8 (62)       | 4 (80)      | 3 (100)        | 3 (100)                 | 20 (83)    |
| Cross <i>et al</i> , 2020 <sup>5</sup>                                  | 2 (100)                                      | 9 (69)       | 4 (80)      | 3 (100)        | 3 (100)                 | 21 (88)    |
| Frankowski <i>et al</i> , 2019 <sup>6</sup>                             | 2 (100)                                      | 9 (60)       | 5 (100)     | 3 (100)        | 2 (67)                  | 21 (81)    |
| Galazzi <i>et al</i> , 2016 <sup>7</sup>                                | 2 (100)                                      | 12 (80)      | 4 (80)      | 3 (100)        | 3 (100)                 | 24 (92)    |
| Gillespie <i>et al</i> , 2019 <sup>8</sup>                              | 2 (100)                                      | 12 (92)      | 4 (80)      | 2 (67)         | 3 (100)                 | 24 (88)    |
| Hao <i>et al</i> , 2018 <sup>10</sup>                                   | 2 (100)                                      | 5 (38)       | 3 (60)      | 0 (0)          | 2 (67)                  | 12 (53)    |
| Hendrix <i>et al</i> , 2019 <sup>11</sup>                               | 2 (100)                                      | 6 (46)       | 3 (75)      | 3 (100)        | 3 (100)                 | 17 (84)    |
| Kalogianis <i>et al</i> , 2016 <sup>12</sup>                            | 2 (100)                                      | 8 (62)       | 5 (100)     | 3 (100)        | 3 (100)                 | 21 (92)    |
| Ng <i>et al</i> , 2017 <sup>13</sup>                                    | 2 (100)                                      | 10 (77)      | 4 (80)      | 3 (100)        | 3 (100)                 | 22 (91)    |
| Qi <i>et al</i> , 2015 <sup>14</sup>                                    | 2 (100)                                      | 11 (85)      | 3 (60)      | 3 (100)        | 3 (100)                 | 22 (89)    |
| Reeve <i>et al</i> , 2014 (thesis) <sup>15,c</sup>                      | 2 (100)                                      | 11 (85)      | 4 (80)      | 2 (67)         | 3 (100)                 | 22 (86)    |
| Reeve <i>et al</i> , 2013 (PATD development + results) <sup>16,17</sup> | 2 (100)                                      | 11 (85)      | 3 (75)      | 3 (100)        | 3 (100)                 | 22 (92)    |
| Saraswathy <i>et al</i> , 2018 <sup>18,d</sup>                          | 2 (100)                                      | 1 (8)        | 3 (60)      | 1 (33)         | 0 (0)                   | 4 (28)     |
| Schiøtz <i>et al</i> , 2018 <sup>19</sup>                               | 2 (100)                                      | 10 (67)      | 3 (75)      | 3 (100)        | 3 (100)                 | 21 (88)    |
| Sirois <i>et al</i> , 2017 <sup>20</sup>                                | 2 (100)                                      | 10 (67)      | 4 (80)      | 3 (100)        | 3 (100)                 | 22 (89)    |
| Turner <i>et al</i> , 2018 <sup>21</sup>                                | 2 (100)                                      | 8 (62)       | 3 (60)      | 2 (67)         | 3 (100)                 | 18 (78)    |
| ul Haq <i>et al</i> , 2016 <sup>22,d</sup>                              | 2 (100)                                      | 3 (23)       | 1 (20)      | 0 (0)          | 0 (0)                   | 6 (29)     |
| Van Marum <i>et al</i> , 2016 <sup>23</sup>                             | 2 (100)                                      | 8 (53)       | 5 (100)     | 3 (100)        | 2 (67)                  | 20 (84)    |
| Whitty <i>et al</i> , 2018 <sup>24</sup>                                | 2 (100)                                      | 8 (62)       | 3 (60)      | 3 (100)        | 3 (100)                 | 19 (84)    |
| <b>rPATD, rPATDcog questionnaires</b>                                   |                                              |              |             |                |                         |            |
| Cardwell <i>et al</i> , 2019 <sup>25</sup>                              | 2 (100)                                      | 7 (54)       | 4 (80)      | 3 (100)        | 3 (100)                 | 17 (81)    |
| Edelman <i>et al</i> , 2019 <sup>26,27</sup>                            | 2 (100)                                      | 12 (80)      | 5 (100)     | 3 (100)        | 3 (100)                 | 25 (95)    |
| Gnjidic <i>et al</i> , 2019 <sup>28</sup>                               | 2 (100)                                      | 9 (69)       | 4 (100)     | 2 (67)         | 3 (100)                 | 20 (87)    |
| Ikeji <i>et al</i> , 2019 <sup>29,30</sup>                              | 2 (100)                                      | 7 (58)       | 2 (67)      | 2 (67)         | 3 (100)                 | 16 (78)    |
| Kua CH <i>et al</i> , 2020 <sup>31</sup>                                | 2 (100)                                      | 11 (85)      | 4 (100)     | 3 (100)        | 2 (67)                  | 21 (85)    |
| Kua K <i>et al</i> , 2019 <sup>32-34</sup>                              | 2 (100)                                      | 9 (60)       | 4 (80)      | 3 (100)        | 3 (100)                 | 21 (88)    |
| Lundby <i>et al</i> , 2019 <sup>35,d</sup>                              | 2 (100)                                      | 5 (33)       | 2 (40)      | 1 (33)         | 0 (0)                   | 10 (41)    |
| Major <i>et al</i> , 2019 <sup>36,e</sup>                               | 2 (100)                                      | 3 (23)       | 2 (50)      | 1 (33)         | 1 (33)                  | 9 (48)     |

|                                                               |         |         |         |         |         |         |
|---------------------------------------------------------------|---------|---------|---------|---------|---------|---------|
| Martinez <i>et al</i> , 2020 <sup>37</sup>                    | 2 (100) | 8 (67)  | 3 (75)  | 3 (100) | 3 (100) | 19 (88) |
| Ng <i>et al</i> , 2019 <sup>38,d</sup>                        | 2 (100) | 4 (31)  | 0 (0)   | 0 (0)   | 0 (0)   | 6 (26)  |
| Nusair <i>et al</i> , 2020 <sup>39</sup>                      | 2 (100) | 11 (73) | 3 (60)  | 3 (100) | 3 (100) | 22 (87) |
| Omar <i>et al</i> , 2019 <sup>40</sup>                        | 2 (100) | 9 (60)  | 4 (80)  | 3 (100) | 3 (100) | 21 (88) |
| Paque <i>et al</i> , 2019 <sup>41</sup>                       | 2 (100) | 11 (73) | 3 (60)  | 3 (100) | 3 (100) | 22 (87) |
| Reeve <i>et al</i> , 2019<br>(rPATD results) <sup>42,43</sup> | 2 (100) | 12 (92) | 4 (80)  | 3 (100) | 3 (100) | 24 (94) |
| Reeve <i>et al</i> , 2018 <sup>44</sup>                       | 2 (100) | 9 (75)  | 4 (80)  | 2 (67)  | 3 (100) | 20 (84) |
| Reeve <i>et al</i> , 2018<br>(rPATDcog) <sup>45</sup>         | 2 (100) | 10 (77) | 3 (60)  | 3 (100) | 3 (100) | 22 (87) |
| Scott <i>et al</i> , 2019 <sup>34</sup>                       | 2 (100) | 10 (77) | 5 (100) | 3 (100) | 3 (100) | 23 (95) |
| Tegegn <i>et al</i> , 2018 <sup>46</sup>                      | 2 (100) | 10 (67) | 4 (80)  | 3 (100) | 3 (100) | 22 (89) |

<sup>a</sup> Assessment of quality reporting was unable to be performed on two of the studies: Candela *et al*, 2019 (thesis in Spanish),<sup>4</sup> and Goulding (unpublished report)<sup>9</sup>

<sup>b</sup> 'Applicable' responses only, 'not applicable' responses are removed

<sup>c</sup> This reference contains results from two cohorts; one of these cohorts was published separately (and so are reported separately: Reeve 2013). Data presented here is from the second cohort only (community pharmacy participants)

<sup>d</sup> This is an abstract

<sup>e</sup> This is a short report

|         |
|---------|
| 67-100% |
| 34-66%  |
| 0-33%   |

**eTable 5. Quality assessment summary using the SURGE checklist according to checklist items (n = 38)<sup>a</sup>**

| Checklist items                                                                   | Yes           | Partially | Not reported | Not applicable |
|-----------------------------------------------------------------------------------|---------------|-----------|--------------|----------------|
| <b>Background (2 items)</b>                                                       | <b>N = 38</b> |           |              |                |
| Study design stated in title/abstract                                             | 36            | 2         | 0            | 0              |
| Purpose or aim of the research                                                    | 37            | 1         | 0            | 0              |
| <b>Methods (15 items)</b>                                                         |               |           |              |                |
| Questionnaire described                                                           | 30            | 8         | 0            | 0              |
| Psychometric properties presented                                                 | 9             | 19        | 10           | 0              |
| References to the original work                                                   | 34            | 2         | 2            | 0              |
| If translated, the procedures to develop and pre-test it provided                 | 4             | 4         | 4            | 26             |
| If translated, reliability and validity reported                                  | 2             | 5         | 6            | 25             |
| Scoring procedures described                                                      | 17            | 2         | 19           | 0              |
| Description of the desired population                                             | 27            | 7         | 4            | 0              |
| Representativeness                                                                | 16            | 9         | 13           | 0              |
| Sample size calculation or justification for not doing one                        | 18            | 1         | 19           | 0              |
| Reported how the survey was administered <sup>b</sup>                             | 30            | -         | 8            | -              |
| Reported the format of the survey                                                 | 13            | -         | 26           | -              |
| Full information about number and type of contact                                 | 1             | 13        | 22           | 2              |
| Report whether incentives were provided                                           | 1             | 0         | 37           | 0              |
| Description of methods used for data analysis                                     | 31            | 1         | 6            | 0              |
| Methods for handling item missing data provided                                   | 19            | 5         | 13           | 1              |
| <b>Results (5 items)</b>                                                          |               |           |              |                |
| Response rate reported or details for why it was not reported                     | 17            | 5         | 14           | 2              |
| All respondents accounted for or details about missing data/participants provided | 29            | 4         | 2            | 3              |
| Details on how non-respondents differ from respondents                            | 3             | 2         | 28           | 5              |
| Results presented clearly                                                         | 33            | 3         | 2            | 0              |
| Results address objectives                                                        | 35            | 2         | 1            | 0              |
| <b>Discussion (3 items)</b>                                                       |               |           |              |                |
| Strengths of the study stated                                                     | 32            | 1         | 5            | 0              |
| Limitations of the study stated                                                   | 32            | 0         | 6            | 0              |
| Generalisability                                                                  | 22            | 6         | 10           | 0              |
| <b>Ethics and disclosure (3 items)</b>                                            |               |           |              |                |
| Sponsorship or funding reported                                                   | 30            | 0         | 8            | 0              |
| Research ethics approval                                                          | 33            | 0         | 5            | 0              |
| Consent                                                                           | 33            | 0         | 5            | 0              |

<sup>a</sup> Assessment of quality reporting was unable to be performed on two of the studies: Candela *et al*, 2019 (thesis in Spanish),<sup>4</sup> and Goulding (unpublished report)<sup>9</sup>

<sup>b</sup> Additional details available in Supplementary Table 6

**eTable 6. Caregivers' results from the rPATD questionnaire**

| Study                                                                  | Q1                               | Q2          | Q3 | Q4 | Q5     | Q6     | Q7 | Q8              | Q9              | Q10 | Q11 | Q12      | Q13 | Q14 | Q15 | Q16 | Q17 | Q18 | Q19 |
|------------------------------------------------------------------------|----------------------------------|-------------|----|----|--------|--------|----|-----------------|-----------------|-----|-----|----------|-----|-----|-----|-----|-----|-----|-----|
|                                                                        | Global                           | Involvement |    |    | Global | Burden |    |                 | Appropriateness |     |     | Concerns |     |     |     |     |     |     |     |
|                                                                        | AGREE % (strongly agree + agree) |             |    |    |        |        |    |                 |                 |     |     |          |     |     |     |     |     |     |     |
| <b>Kua C-H et al, 2020<sup>31</sup></b>                                | 86                               | 80          | 90 | 91 | 82     | 87     | 56 | 55              | 57              | 45  | 40  | 45       | 29  | 34  | 17  | 18  | 35  | 35  | 20  |
| <b>Kua K et al, 2019<sup>32-34</sup></b>                               | 83                               | 50          | 60 | 73 | 52     | 65     | 48 | 44              | 46              | 39  | 52  | 54       | 31  | 35  | 31  | 23  | 39  | 40  | 14  |
| <b>Paque et al, 2019<sup>41</sup></b>                                  | 85                               | 74          | 75 | 81 | 54     | 79     | 22 | 20              | 19              | 4   | 15  | 14       | 11  | 14  | 6   | 17  | 40  | 13  | 11  |
| <b>Reeve et al, 2019 (rPATD development + results)<sup>42,43</sup></b> | 82                               | 88          | 95 | 86 | 83     | 84     | 41 | 42              | 31              | 25  | 21  | 15       | 22  | 29  | 16  | 21  | 36  | 29  | 21  |
| <b>Scott et al, 2019<sup>34</sup></b>                                  | 80                               | 66          | 80 | 71 | 75     | 81     | 53 | 57 <sup>a</sup> | 37              | 22  | 44  | 24       | 37  | 36  | 22  | 7   | 54  | 17  | 21  |

Q1. Overall, I am satisfied with my care recipient's current medicines

Q2. I like to be involved in making decisions about my care recipient's medicines with their doctors

Q3. I like to know as much as possible about my care recipient's medicines

Q4. I always ask the doctor, pharmacist or other health care professional if there is something I don't understand about my care recipient's medicines

Q5. I know exactly what medicines the person that I care for is currently taking and/or I have an up to date list of their medicines

Q6. If their doctor said it was possible I would be willing to stop one or more of my care recipient's medicines

Q7. I feel that the person I care for is taking a large number of medicines

Q8. My care recipient's medicines are quite expensive

Q9. Sometimes I think the person I care for takes too many medicines

Q10. I feel that my care recipient's medicines are a burden to them

Q11. I would like the doctor to try stopping one of my care recipient's medicines to see how they feel without it

Q12. I would like the doctor to reduce the dose of one or more of my care recipient's medicines

Q13. I feel that the person that I care for may be taking one or more medicines that they no longer need

Q14. I believe one or more of my care recipient's medicines may be currently giving them side effects

Q15. I think one or more of my care recipient's medicines may not be working

Q16. The person that I care for has had a bad experience when stopping a medicine before

Q17. I would be reluctant to stop one of my care recipient's medicines that they had been taking for a long time

Q18. I get stressed whenever changes are made to my care recipient's medicines

Q19. I feel that if I agreed to stopping one of my care recipient's medicines then this is giving up on them

<sup>a</sup> Question modified for the UK context: 'I feel the National Health Service (NHS) spends a lot of money on my care recipient's medicines'

|              |
|--------------|
| Not reported |
| 0-10%        |
| 11-20%       |
| 21-30%       |
| 31-40%       |
| 41-50%       |
| 51-60%       |
| 61-70%       |
| 71-80%       |
| 81-90%       |
| 91-100%      |

**eTable 7. Patients: Associations with primary outcome question “If my doctor said it was possible, I would be willing to stop one or more of my regular medicines”**

| Variable: # of studies reporting a significant association/# of studies that examined the association | Study                                                                    | Associations found                                                                                                                                                                                   |
|-------------------------------------------------------------------------------------------------------|--------------------------------------------------------------------------|------------------------------------------------------------------------------------------------------------------------------------------------------------------------------------------------------|
| <b>Age: 5/12</b>                                                                                      | Aoki <i>et al</i> , 2019 <sup>3</sup>                                    | <sup>3</sup> Increasing age was found to be significantly associated with patients’ willingness to deprescribe (OR per 10-year increase 1.12; 95% CI 1.04–1.20)                                      |
|                                                                                                       | Hao <i>et al</i> , 2018 <sup>10</sup>                                    | <sup>10</sup> Age of participant was negatively correlated with willingness to deprescribe (Spearman’s rho ( $\rho$ ) = -0.127, $p < 0.05$ )                                                         |
|                                                                                                       | Kua, K <i>et al</i> 2019 <sup>32</sup>                                   | <sup>32</sup> Patients aged 75 and over were more willing to have their medications deprescribed ( $p = 0.003$ )                                                                                     |
|                                                                                                       | Ng <i>et al</i> , 2017 <sup>13</sup>                                     | <sup>13</sup> Patients of younger age (<65 years old) were more willing to have their medications deprescribed ( $p = 0.02$ )                                                                        |
|                                                                                                       | ul Haq <i>et al</i> , 2016 <sup>22</sup>                                 | <sup>22</sup> Age (not specific) had a significant influence on the positive attitude ( $p = 0.001$ ) on willingness to deprescribe                                                                  |
|                                                                                                       | Kua C-H <i>et al</i> , 2020 <sup>31</sup>                                | No significant association                                                                                                                                                                           |
|                                                                                                       | Qi <i>et al</i> , 2015 <sup>47</sup>                                     | No significant association                                                                                                                                                                           |
|                                                                                                       | Tegegn <i>et al</i> , 2018 <sup>48</sup>                                 | No significant association                                                                                                                                                                           |
|                                                                                                       | Reeve <i>et al</i> , 2019 <sup>42,43</sup> (rPATD development + results) | No significant association                                                                                                                                                                           |
|                                                                                                       | Reeve <i>et al</i> , 2018 <sup>44</sup>                                  | No significant association                                                                                                                                                                           |
|                                                                                                       | Reeve <i>et al</i> , 2014 <sup>49</sup> (thesis) <sup>a</sup>            | No significant association                                                                                                                                                                           |
|                                                                                                       | Reeve <i>et al</i> , 2013 <sup>16,17</sup> (PATD development + results)  | No significant association                                                                                                                                                                           |
| <b>Number of medications: 3/11</b>                                                                    | Aoki <i>et al</i> , 2019 <sup>3</sup>                                    | <sup>3</sup> Patients: $\geq 5$ (polypharmacy) more willing to deprescribe than 1-4 regular prescription meds (aOR 1.43; 95% CI 1.08–1.88)                                                           |
|                                                                                                       | Kua C-H <i>et al</i> , 2020 <sup>31</sup>                                | <sup>31</sup> Unclear if finding is + or – “No significant differences in sub-group analysis” ( $p = 0.031$ )                                                                                        |
|                                                                                                       | Reeve <i>et al</i> , 2018 <sup>44</sup>                                  | <sup>44</sup> Older adults taking 6 or more medications compared with fewer than 6 (adjusted odds ratio [aOR], 2.90; 95%CI, 1.74-4.82) had greater odds of willingness to deprescribe ( $p < 0.05$ ) |
|                                                                                                       | Reeve <i>et al</i> , 2013 <sup>16,17</sup> (PATD development + results)  | No significant association                                                                                                                                                                           |
|                                                                                                       | Gillespie <i>et al</i> , 2019 <sup>8</sup>                               | No significant association                                                                                                                                                                           |
|                                                                                                       | Kua, K <i>et al</i> 2019 <sup>32</sup>                                   | No significant association                                                                                                                                                                           |
|                                                                                                       | Kalogianis <i>et al</i> , 2016                                           | No significant association                                                                                                                                                                           |
|                                                                                                       | Qi <i>et al</i> , 2015 <sup>47</sup>                                     | No significant association                                                                                                                                                                           |
|                                                                                                       | ul Haq <i>et al</i> , 2016 <sup>22</sup>                                 | No significant association                                                                                                                                                                           |
|                                                                                                       | Reeve <i>et al</i> , 2014 <sup>49</sup> (thesis) <sup>a</sup>            | No significant association                                                                                                                                                                           |
|                                                                                                       | Reeve <i>et al</i> , 2013 <sup>16,17</sup> (PATD development +           | No significant association                                                                                                                                                                           |

|                                                                            |                                                                          |                                                                                                                                                                                                                               |
|----------------------------------------------------------------------------|--------------------------------------------------------------------------|-------------------------------------------------------------------------------------------------------------------------------------------------------------------------------------------------------------------------------|
|                                                                            | <i>results)</i>                                                          |                                                                                                                                                                                                                               |
| <b>Number of chronic health conditions: 2/4</b>                            | Aoki <i>et al</i> , 2019 <sup>3</sup>                                    | <sup>3</sup> Two or more chronic health conditions were positively associated with patients' willingness to deprescribe [adjusted odds ratio (aOR) 1.35; 95% confidence interval (CI) 1.06–1.72]. Adjusted for age and sex    |
|                                                                            | Reeve <i>et al</i> , 2018 <sup>44</sup>                                  | <sup>44</sup> Older adults with 2 to 3 (aOR, 2.87; 95%CI, 1.75-4.69) and more than 3 medical conditions (aOR, 2.87; 95%CI, 1.53-5.37) compared with fewer than 2 had greater odds of willingness to deprescribe ( $p < .05$ ) |
|                                                                            | Reeve <i>et al</i> , 2013 <sup>16,17</sup> (PATD development + results)  | No significant association                                                                                                                                                                                                    |
|                                                                            | Tegegn <i>et al</i> , 2018 <sup>48</sup> (Charlson Comorbidity Index)    | No significant association                                                                                                                                                                                                    |
| <b>Gender (female): 0/6</b>                                                | Aoki <i>et al</i> , 2019 <sup>3</sup>                                    | No significant association                                                                                                                                                                                                    |
|                                                                            | Kua C-H <i>et al</i> , 2020 <sup>31</sup>                                | No significant association                                                                                                                                                                                                    |
|                                                                            | Kua, K <i>et al</i> 2019 <sup>32</sup>                                   | No significant association                                                                                                                                                                                                    |
|                                                                            | Tegegn <i>et al</i> , 2018 <sup>48</sup>                                 | No significant association                                                                                                                                                                                                    |
|                                                                            | Reeve <i>et al</i> , 2019 <sup>42,43</sup> (rPATD development + results) | No significant association                                                                                                                                                                                                    |
|                                                                            | Reeve <i>et al</i> , 2018 <sup>44</sup>                                  | No significant association                                                                                                                                                                                                    |
| <b>Education level: 1/6</b>                                                | Kua, K <i>et al</i> 2019 <sup>32</sup>                                   | <sup>32</sup> Patients with lower educational level may be more willing to have their medications deprescribed ( $-0.158$ , $p < 0.001$ ) Spearman's correlation test                                                         |
|                                                                            | Reeve <i>et al</i> , 2018 <sup>44</sup>                                  | No significant association                                                                                                                                                                                                    |
|                                                                            | Aoki <i>et al</i> , 2019 <sup>3</sup>                                    | No significant association                                                                                                                                                                                                    |
|                                                                            | Kua C-H <i>et al</i> , 2020 <sup>31</sup>                                | No significant association                                                                                                                                                                                                    |
|                                                                            | Reeve <i>et al</i> , 2019 <sup>42,43</sup> (rPATD development + results) | No significant association                                                                                                                                                                                                    |
|                                                                            | Tegegn <i>et al</i> , 2018 <sup>48</sup>                                 | No significant association                                                                                                                                                                                                    |
| <b>Discount medications (concession card or drug coverage) (yes): 2/4</b>  | Reeve <i>et al</i> , 2019 <sup>42,43</sup> (rPATD development + results) | <sup>42,43</sup> Possession of a concession card (OR = 3.194; 95% CI = 1.19-8.59) increased the likelihood of agreeing to have a medication deprescribed (older adults)                                                       |
|                                                                            | Reeve <i>et al</i> , 2013 <sup>16,17</sup> (PATD development + results)  | <sup>16,17</sup> Possession of a medication discount card was correlated with less willingness to stop a medication ( $p = 0.048$ )                                                                                           |
|                                                                            | Reeve <i>et al</i> , 2018 <sup>44</sup>                                  | No significant association                                                                                                                                                                                                    |
|                                                                            | ul Haq <i>et al</i> , 2016 <sup>22</sup>                                 | No significant association                                                                                                                                                                                                    |
| <b>Trust in physician (High Wake Forest Trust in Physician score): 2/3</b> | Ng <i>et al</i> , 2017 <sup>13</sup>                                     | <sup>13</sup> Patients with a higher physician trust score were more willing to deprescribe ( $p = <0.01$ )                                                                                                                   |
|                                                                            | Reeve <i>et al</i> , 2013 <sup>16,17</sup> (PATD development + results)  | <sup>16,17</sup> Higher physician trust score was correlated with greater willingness to stop a medication ( $p = 0.05$ )                                                                                                     |
|                                                                            | Reeve <i>et al</i> , 2019 <sup>42,43</sup> (rPATD development + results) | No significant association                                                                                                                                                                                                    |
| <b>Cognitive impairment or dementia: 0/2</b>                               | Reeve <i>et al</i> , 2018 <sup>44</sup>                                  | No significant association                                                                                                                                                                                                    |
|                                                                            | Qi <i>et al</i> , 2015 <sup>47</sup>                                     | No significant association                                                                                                                                                                                                    |
| <b>Frailty: 1/2</b>                                                        | Reeve <i>et al</i> , 2018 <sup>44</sup>                                  | <sup>44</sup> Older adults reporting fair/poor health compared                                                                                                                                                                |

|                                                                                   |                                                                                 |                                                                                                                                                                                             |
|-----------------------------------------------------------------------------------|---------------------------------------------------------------------------------|---------------------------------------------------------------------------------------------------------------------------------------------------------------------------------------------|
|                                                                                   |                                                                                 | with excellent/very good health (aOR, 0.46; 95% CI, 0.24-0.86) had lower odds of willingness to deprescribe (p = < 0.05)                                                                    |
|                                                                                   | Qi <i>et al</i> , 2015 <sup>47</sup>                                            | No significant association                                                                                                                                                                  |
| <b>Number of doctors (greater than 3): 1/1</b>                                    | Kua C-H <i>et al</i> , 2020 <sup>31</sup>                                       | <sup>31</sup> Having greater than three doctors was correlated with willingness to stop a medication (p = 0.014) Mann–Whitney U test                                                        |
| <b>Use of a dose administration aid: 0/2</b>                                      | Reeve <i>et al</i> , 2019 <sup>42,43</sup> (rPATD development + results)        | No significant association                                                                                                                                                                  |
|                                                                                   | Reeve <i>et al</i> , 2013 <sup>16,17</sup> (PATD development + results)         | No significant association                                                                                                                                                                  |
| <b>Self-managed medications: 0/2</b>                                              | Kua C-H <i>et al</i> , 2020 <sup>31</sup>                                       | No significant association                                                                                                                                                                  |
|                                                                                   | Reeve <i>et al</i> , 2019 <sup>42,43</sup> (rPATD development + results)        | No significant association                                                                                                                                                                  |
| <b>Private health insurance: 0/2</b>                                              | Kua C-H <i>et al</i> , 2020 <sup>31</sup>                                       | No significant association                                                                                                                                                                  |
|                                                                                   | Reeve <i>et al</i> , 2019 <sup>42,43</sup> (rPATD development + results)        | No significant association                                                                                                                                                                  |
| <b>Overall health literacy (All Aspects of Health Literacy Scale (AAHLS): 1/1</b> | Gillespie <i>et al</i> , 2019 <sup>8</sup>                                      | <sup>8</sup> A positive correlation between willingness to stop one or more medications and overall health literacy scores (rs = 0.229, p = < 0.009)                                        |
| <b>Critical health literacy (AAHLS): 1/1</b>                                      | Gillespie <i>et al</i> , 2019 <sup>8</sup>                                      | <sup>8</sup> A positive correlation between willingness to stop one or more medications and critical health literacy scores (rs = 0.198, p = < 0.021)                                       |
| <b>Health status: 1/3</b>                                                         | Reeve <i>et al</i> , 2018 <sup>44</sup>                                         | <sup>44</sup> Older adults reporting fair/poor health compared with excellent/very good health (aOR, 0.46; 95% CI, 0.24-0.86) had lower odds of willingness to deprescribe (p = < 0.05)     |
|                                                                                   | Aoki <i>et al</i> , 2019 <sup>3</sup>                                           | No significant association                                                                                                                                                                  |
|                                                                                   | Reeve <i>et al</i> , 2019 <sup>42,43</sup> (rPATD development + results)        | No significant association                                                                                                                                                                  |
| <b>Mental health status: 0/2</b>                                                  | Aoki <i>et al</i> , 2019 <sup>3</sup> (MCS Mental Health Composite Scale score) | No significant association                                                                                                                                                                  |
|                                                                                   | Reeve <i>et al</i> , 2019 <sup>42,43</sup> (rPATD development + results)        | No significant association                                                                                                                                                                  |
| <b>Setting: 1/1</b>                                                               | Kua C-H <i>et al</i> , 2020 <sup>31</sup>                                       | <sup>31</sup> Acute hospital patients were more willing to deprescribe than community pharmacy (p = 0.023)                                                                                  |
| <b>Number of visits to a medical institution: 1/1</b>                             | Aoki <i>et al</i> , 2019 <sup>3</sup>                                           | <sup>3</sup> 2-5 medical visits more willing to deprescribe than ≤ 1 medical visits: 1.34 (1.03–1.75) (p=0.028)                                                                             |
| <b>Number of medical centres managing the patient: 0/2</b>                        | Kua, K <i>et al</i> , 2019 <sup>32</sup>                                        | No significant association                                                                                                                                                                  |
|                                                                                   | Edelman <i>et al</i> , 2019 <sup>26,27</sup>                                    | No significant association                                                                                                                                                                  |
| <b>English as a first language: 1/1</b>                                           | Reeve <i>et al</i> , 2019 <sup>42,43</sup> (rPATD development + results)        | <sup>42,43</sup> Having English as a first language (OR = 3.779; 95% CI = 1.07-13.36) increased the likelihood of agreeing to have a medication deprescribed                                |
| <b>Race: 1/1</b>                                                                  | Reeve <i>et al</i> , 2018 <sup>44</sup>                                         | <sup>44</sup> Non-Hispanic black respondents (aOR, 0.60; 95% CI, 0.37-0.96) and respondents of other races (aOR, 0.46; 95%CI,0.24-0.89) had lower odds of willingness to deprescribe (p = < |



|                                                    |                                                                                  |                            |
|----------------------------------------------------|----------------------------------------------------------------------------------|----------------------------|
|                                                    |                                                                                  | 0.05)                      |
| <b>Previous experience with deprescribing: 0/2</b> | Reeve <i>et al</i> , 2013 <sup>16,17</sup> ( <i>PATD development + results</i> ) | No significant association |
|                                                    | Paque <i>et al</i> , 2019 <sup>41</sup>                                          | No significant association |

Variables not included in this table were only studied in a single study and no association found: number of medication doses per day<sup>3</sup>, income<sup>3</sup>, functional and communicative health literacy (AAHLS)<sup>8</sup>, living situation<sup>31</sup>, recent fall<sup>44</sup>, high patient autonomy index score<sup>42,43</sup>, reason for hospital admission<sup>48</sup>, recent medication review<sup>42,43</sup>, goals of care: 'extend duration of life, goals of care: 'be comfortable'<sup>42,43</sup>.

<sup>a</sup> This reference contains results from two cohorts; one of these cohorts was published separately (and so are reported separately: Reeve 2013). Data presented here is from the second cohort only (community pharmacy participants)

**eTable 8. Caregivers: Associations with the primary outcome question “If their doctor said it was possible, I would be willing to stop one or more of my care recipient’s medicines”**

| Source, year                                              | Variables, statistical significance and direction of association |                 |                 |                            |                                               |                    |                                         |
|-----------------------------------------------------------|------------------------------------------------------------------|-----------------|-----------------|----------------------------|-----------------------------------------------|--------------------|-----------------------------------------|
|                                                           | Age (increasing)                                                 | Gender (female) | Education level | Self-managed medications ± | Self-rated physical health (excellent/good) ± | Number of doctors± | Previous experience with deprescribing± |
| <b>rPATD</b>                                              |                                                                  |                 |                 |                            |                                               |                    |                                         |
| <b>Kua C-H et al, 2020</b> <sup>31</sup>                  | NS                                                               | NS              | S+ <sup>a</sup> | NS <sup>b</sup>            | /                                             | S+ <sup>c</sup>    | /                                       |
| <b>Reeve et al, 2019 (rPATD results)</b> <sup>42,43</sup> | NS                                                               | NS              | NS              | S+                         | S+                                            | /                  | /                                       |
| <b>Paque et al, 2019</b> <sup>41</sup>                    | /                                                                | /               | /               | /                          | /                                             | /                  | NS                                      |
| <b>TOTAL EXAMINED</b>                                     | <b>1</b>                                                         | <b>1</b>        | <b>2</b>        | <b>2</b>                   | <b>1</b>                                      | <b>1</b>           | <b>1</b>                                |
| <b>TOTAL SIGNIFICANT</b>                                  | <b>0</b>                                                         | <b>0</b>        | <b>1</b>        | <b>1</b>                   | <b>1</b>                                      | <b>1</b>           | <b>0</b>                                |

NE = Not examined

NS = Not significant

S = Significant

+ = Increasing/higher variable (or Female gender or previous experience with deprescribing) associated with increasing willingness to deprescribe

– = Decreasing/lower variable (or Male gender, or no previous experience with deprescribing) associated with increasing willingness to deprescribe

<sup>a</sup> University>secondary

<sup>b</sup> Self-managed/self-managed with help/family or friend

<sup>c</sup> More than 3 doctors or less than 3 doctors

± Of care recipient

**eFigure 1: PRISMA Flow diagram of included articles**

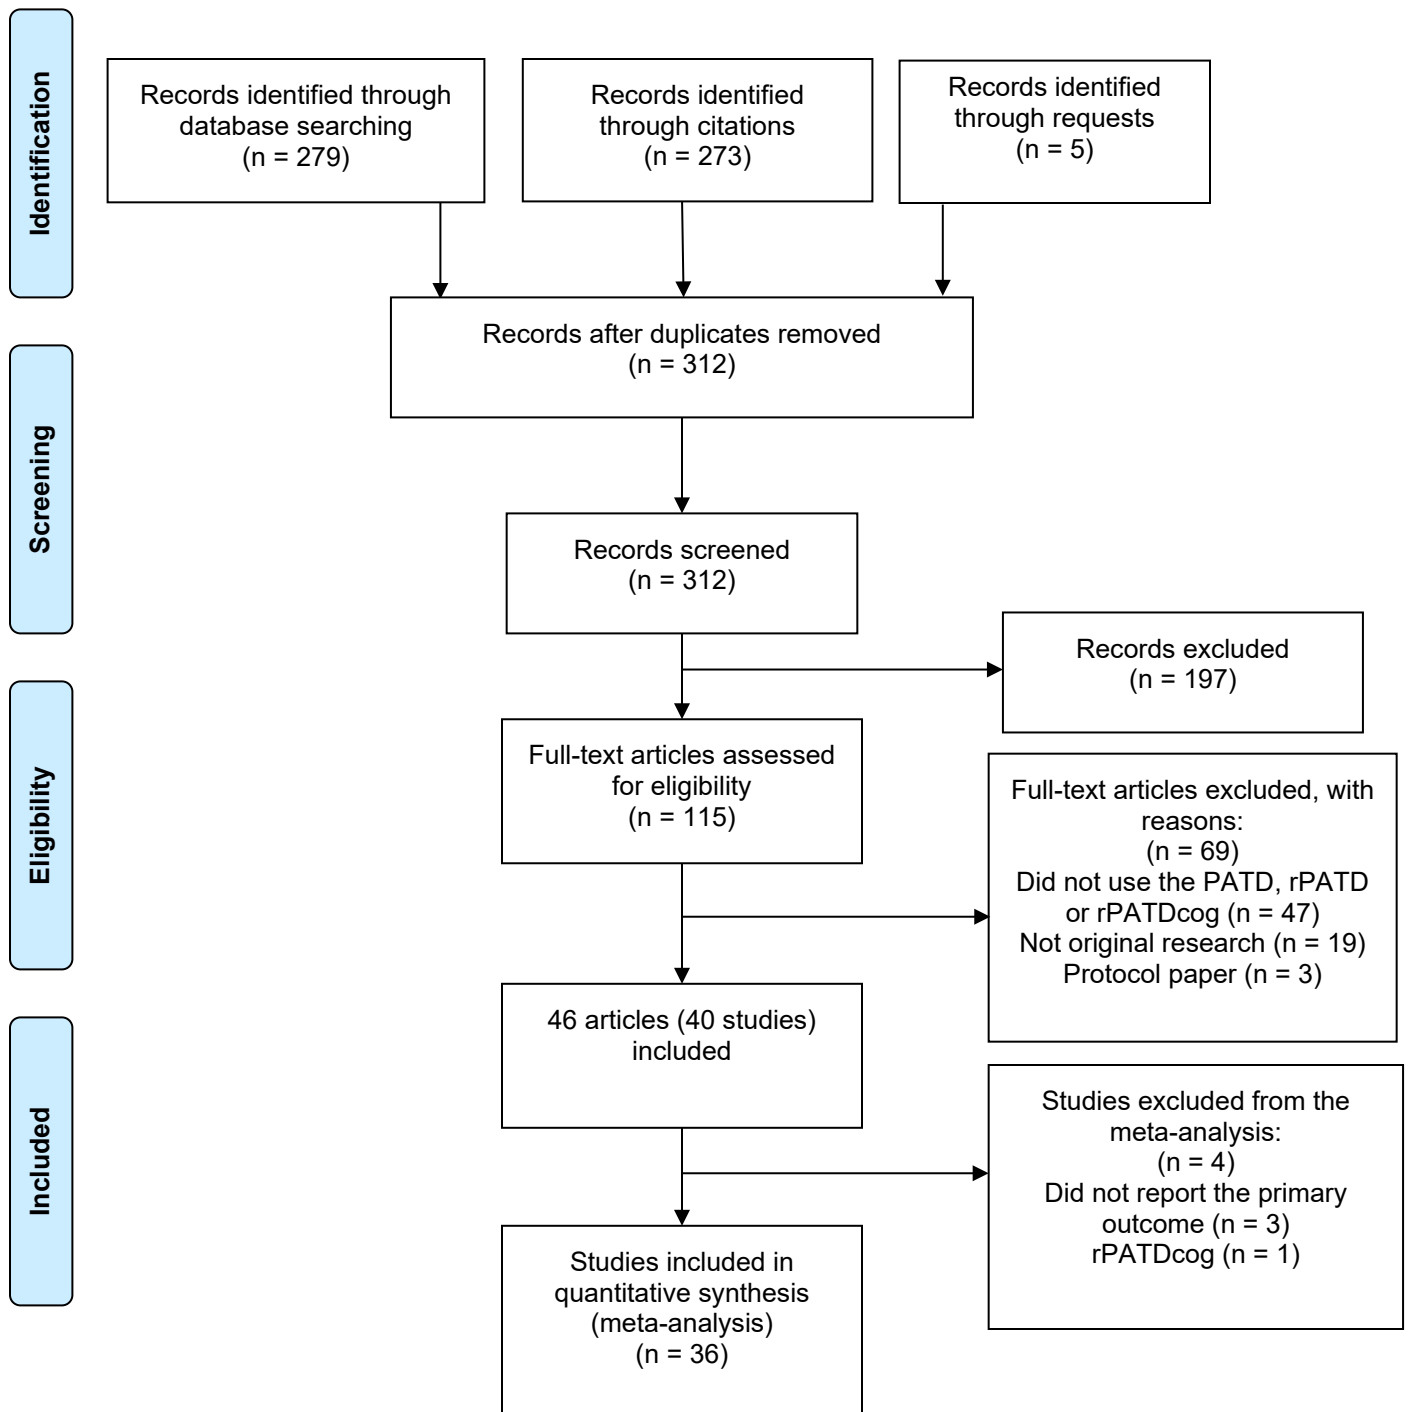

**eFigure 2. Subgroup analyses of proportion of patients who agreed or strongly agreed with the question “If my doctor said it was possible, I would be willing to stop one or more of my medicines”**

**2a. Study setting (residential aged care facilities, community/primary care, outpatients/ambulatory care, inpatients/hospital)**

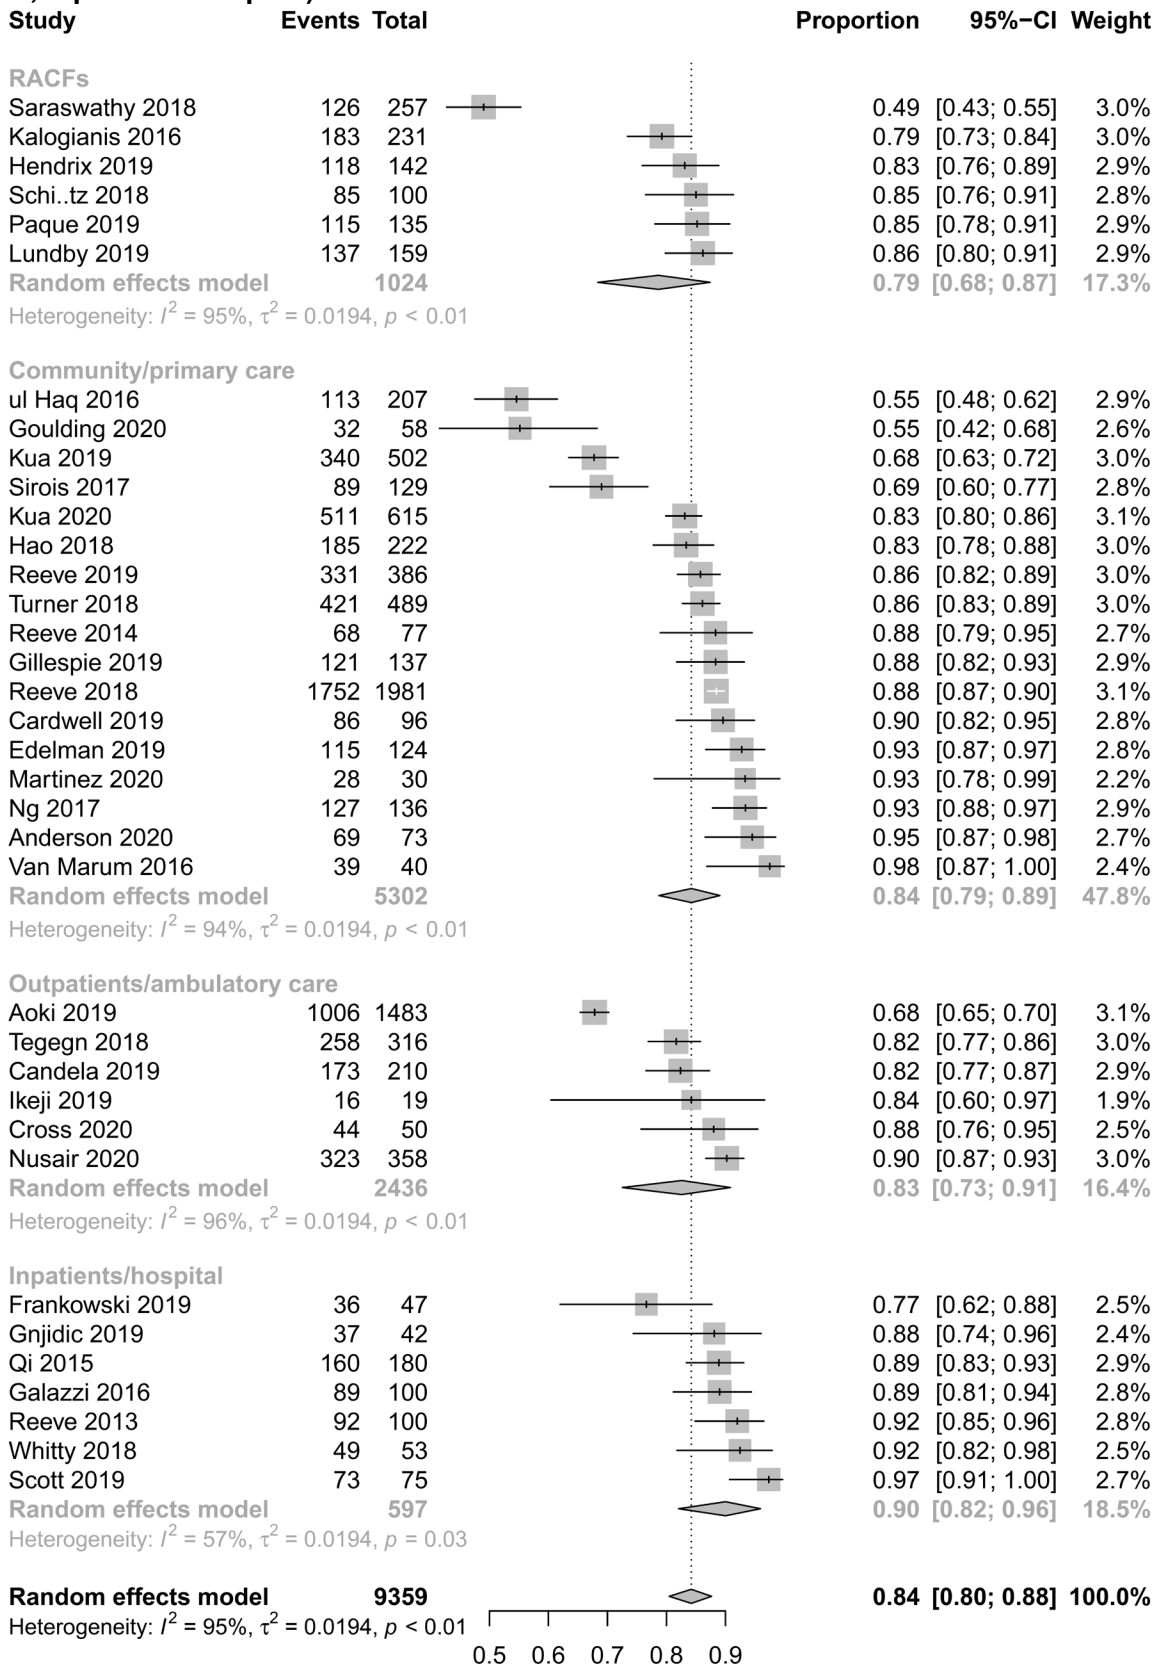

RACFS = Residential Aged Care Facilities

## 2b. Age (no age criteria vs older adults: ≥65 years)

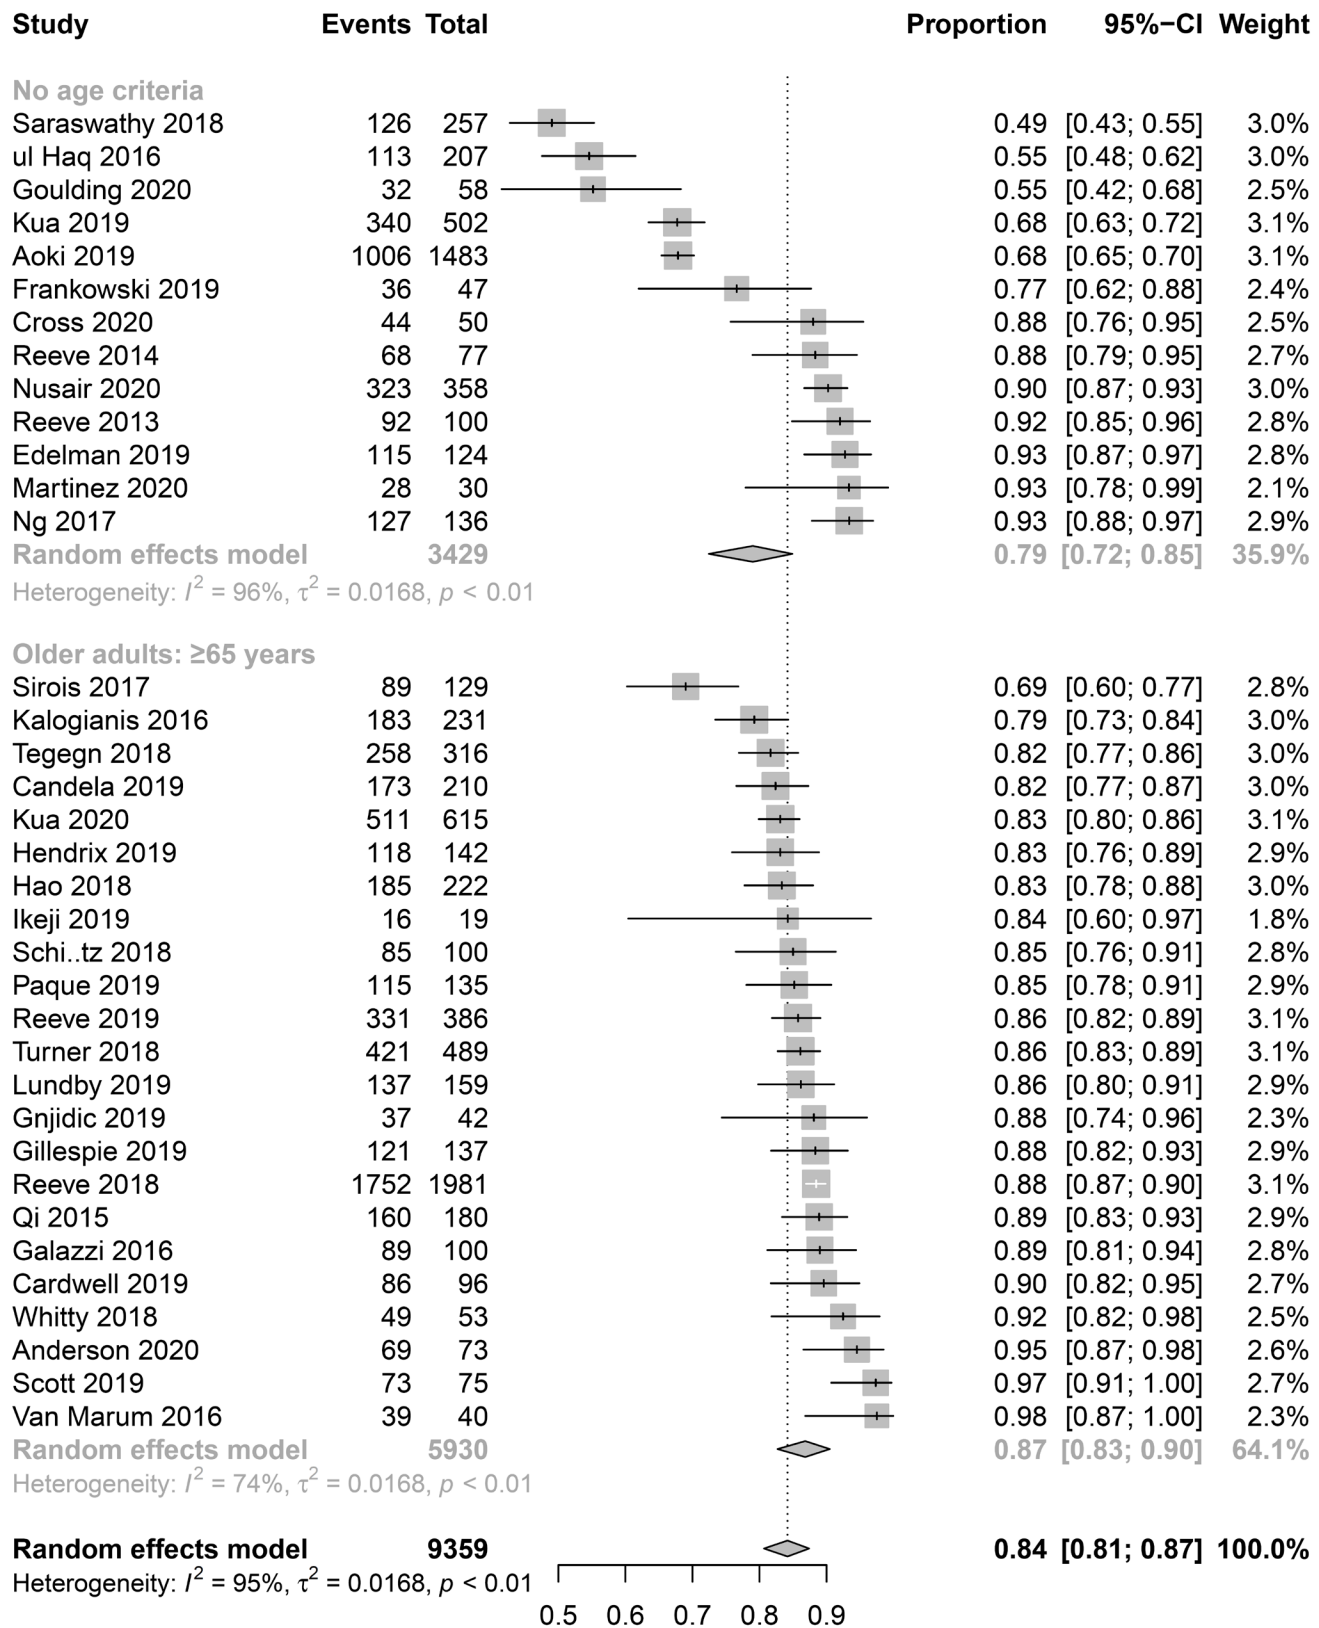

## 2c. Continent

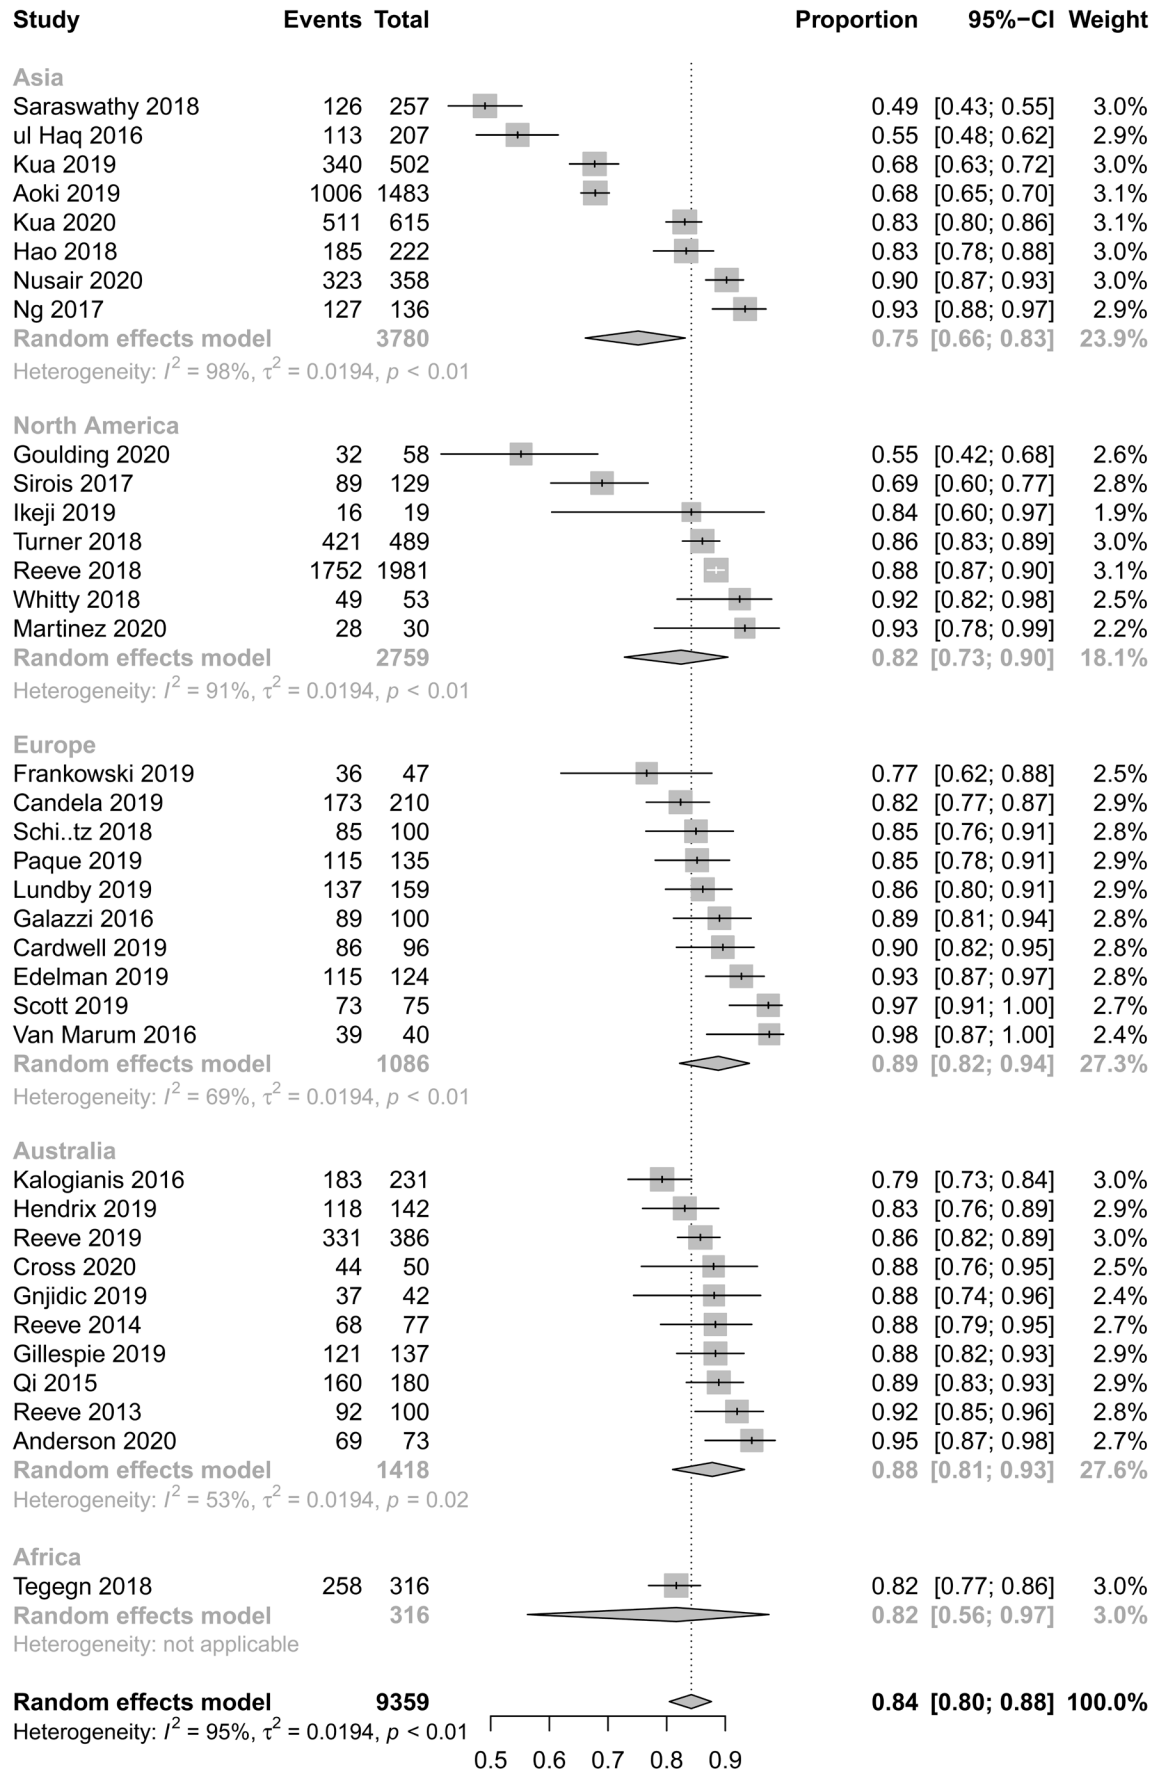

## 2d. Polypharmacy: taking 5 or more regular medications vs no polypharmacy criteria

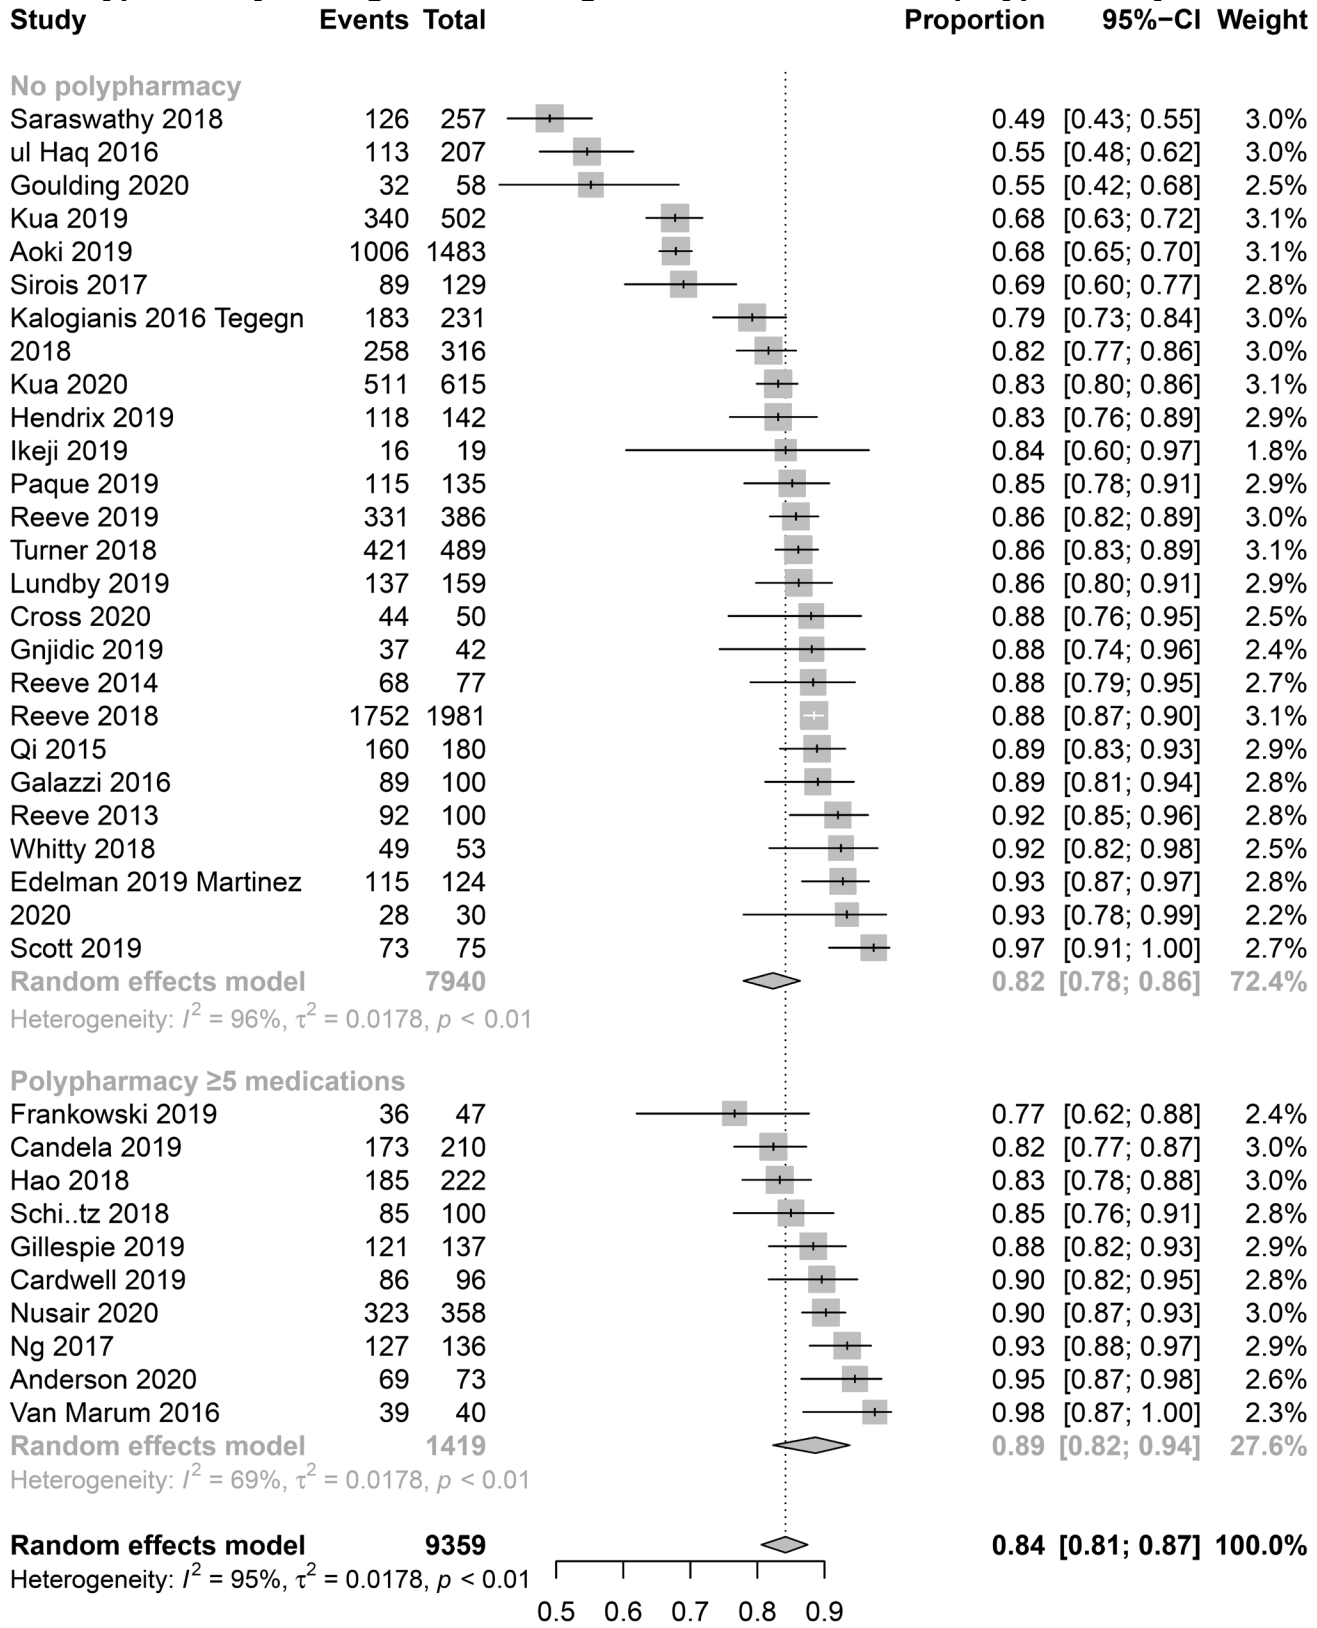

## 2e. Survey administration (self-administered, researcher administered, self-administered with help available)

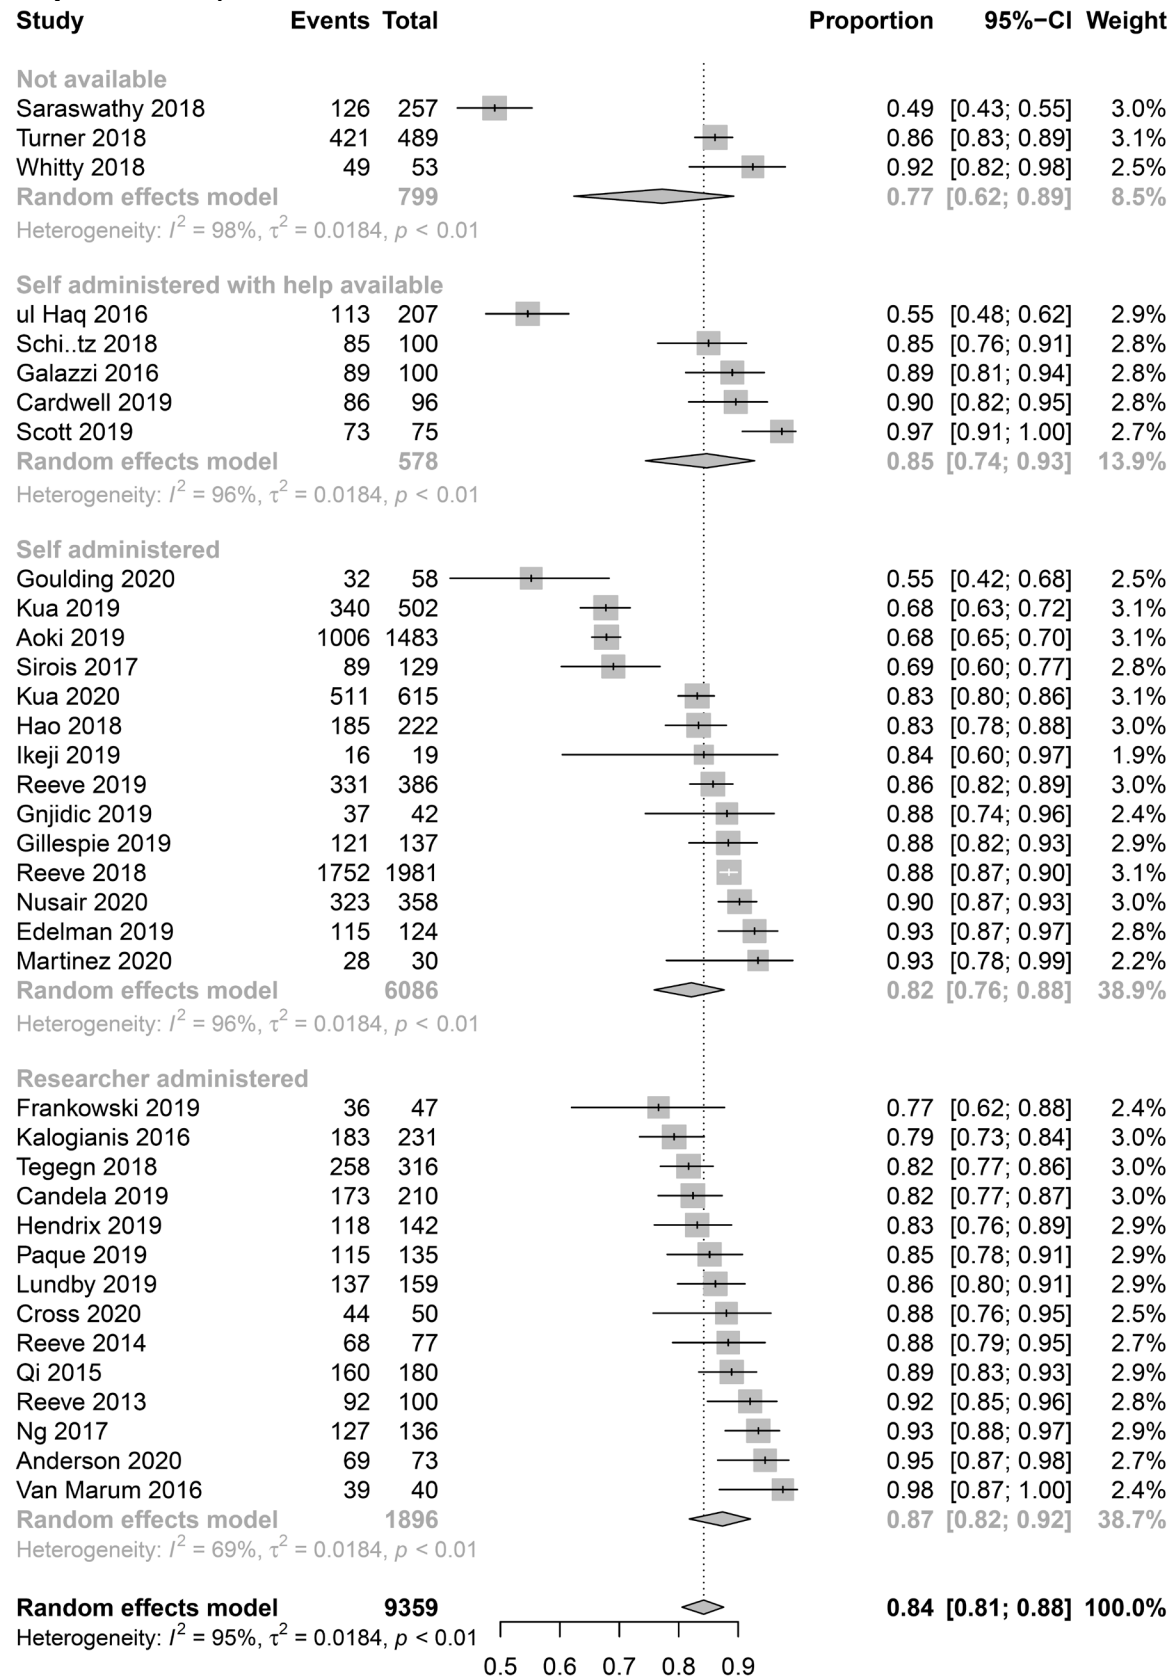



## 2f. Peer-reviewed status (included journal articles and published theses)

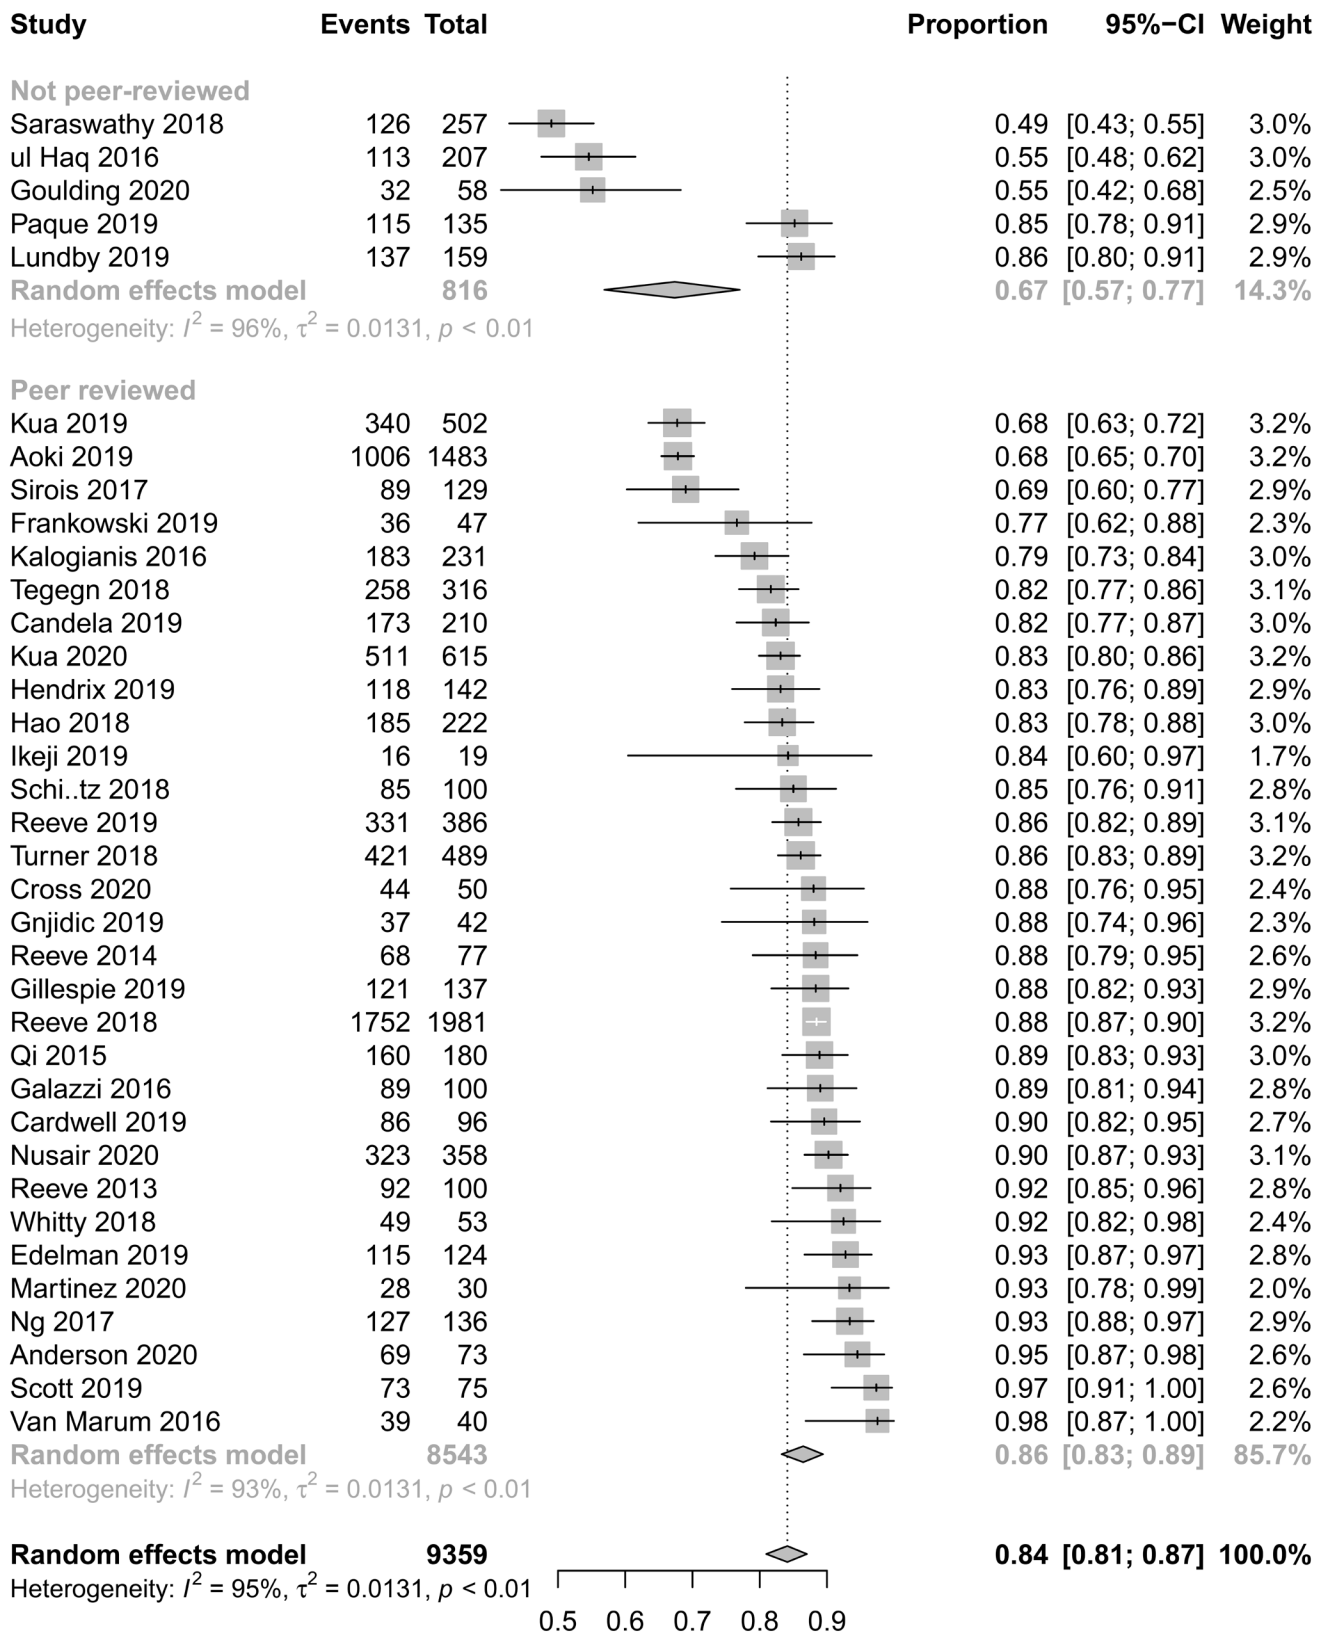

eFigure 3. Funnel plots of patients, caregivers, and sample size

3a. Funnel plot patients

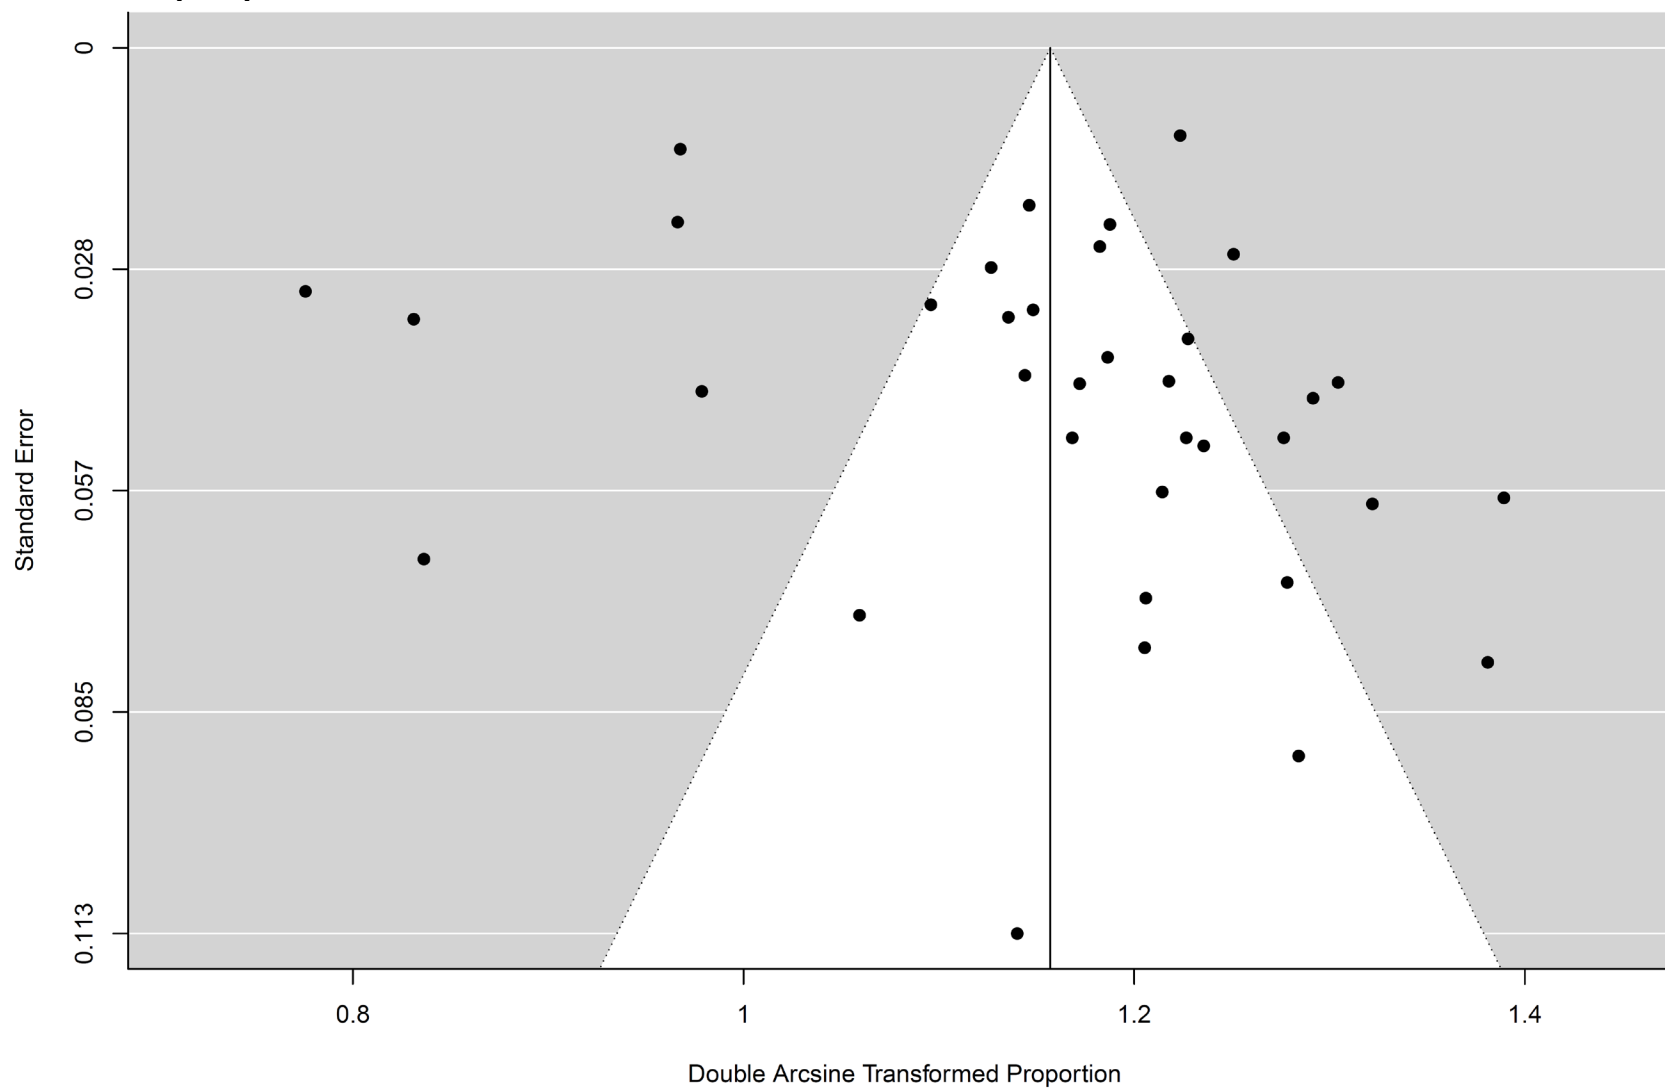

3b. Funnel plot caregivers

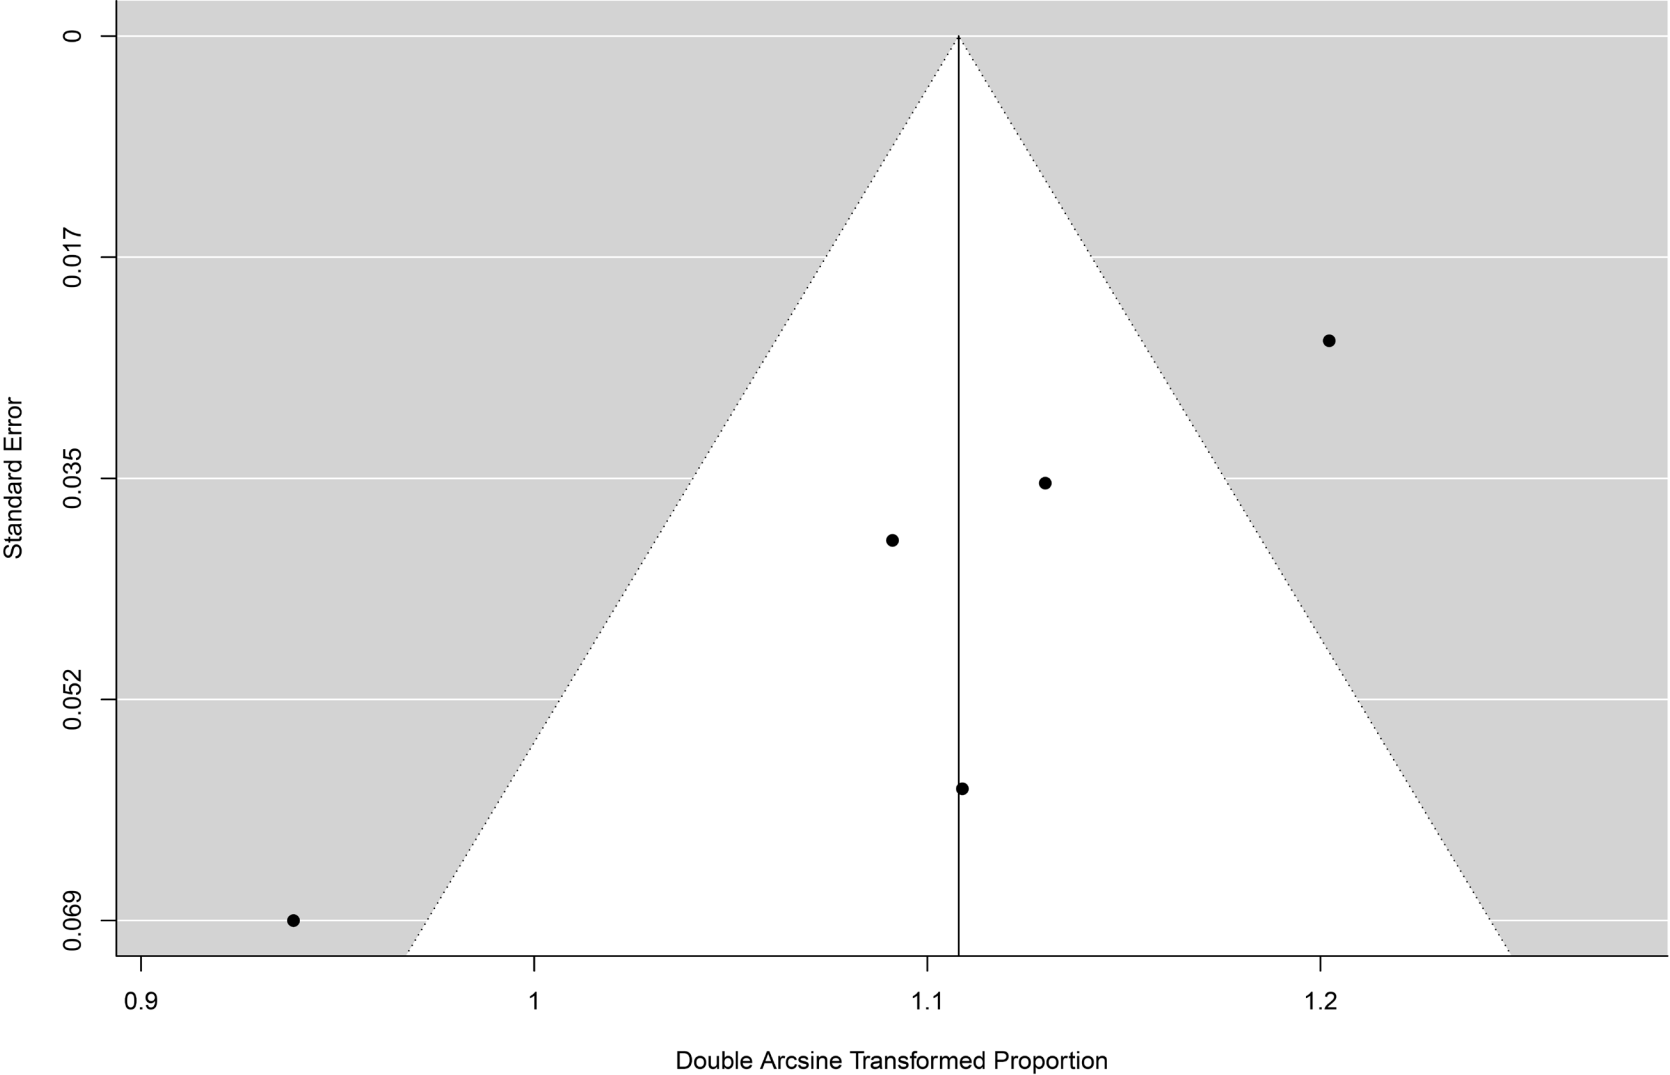

### 3c. Funnel plot sample size patients

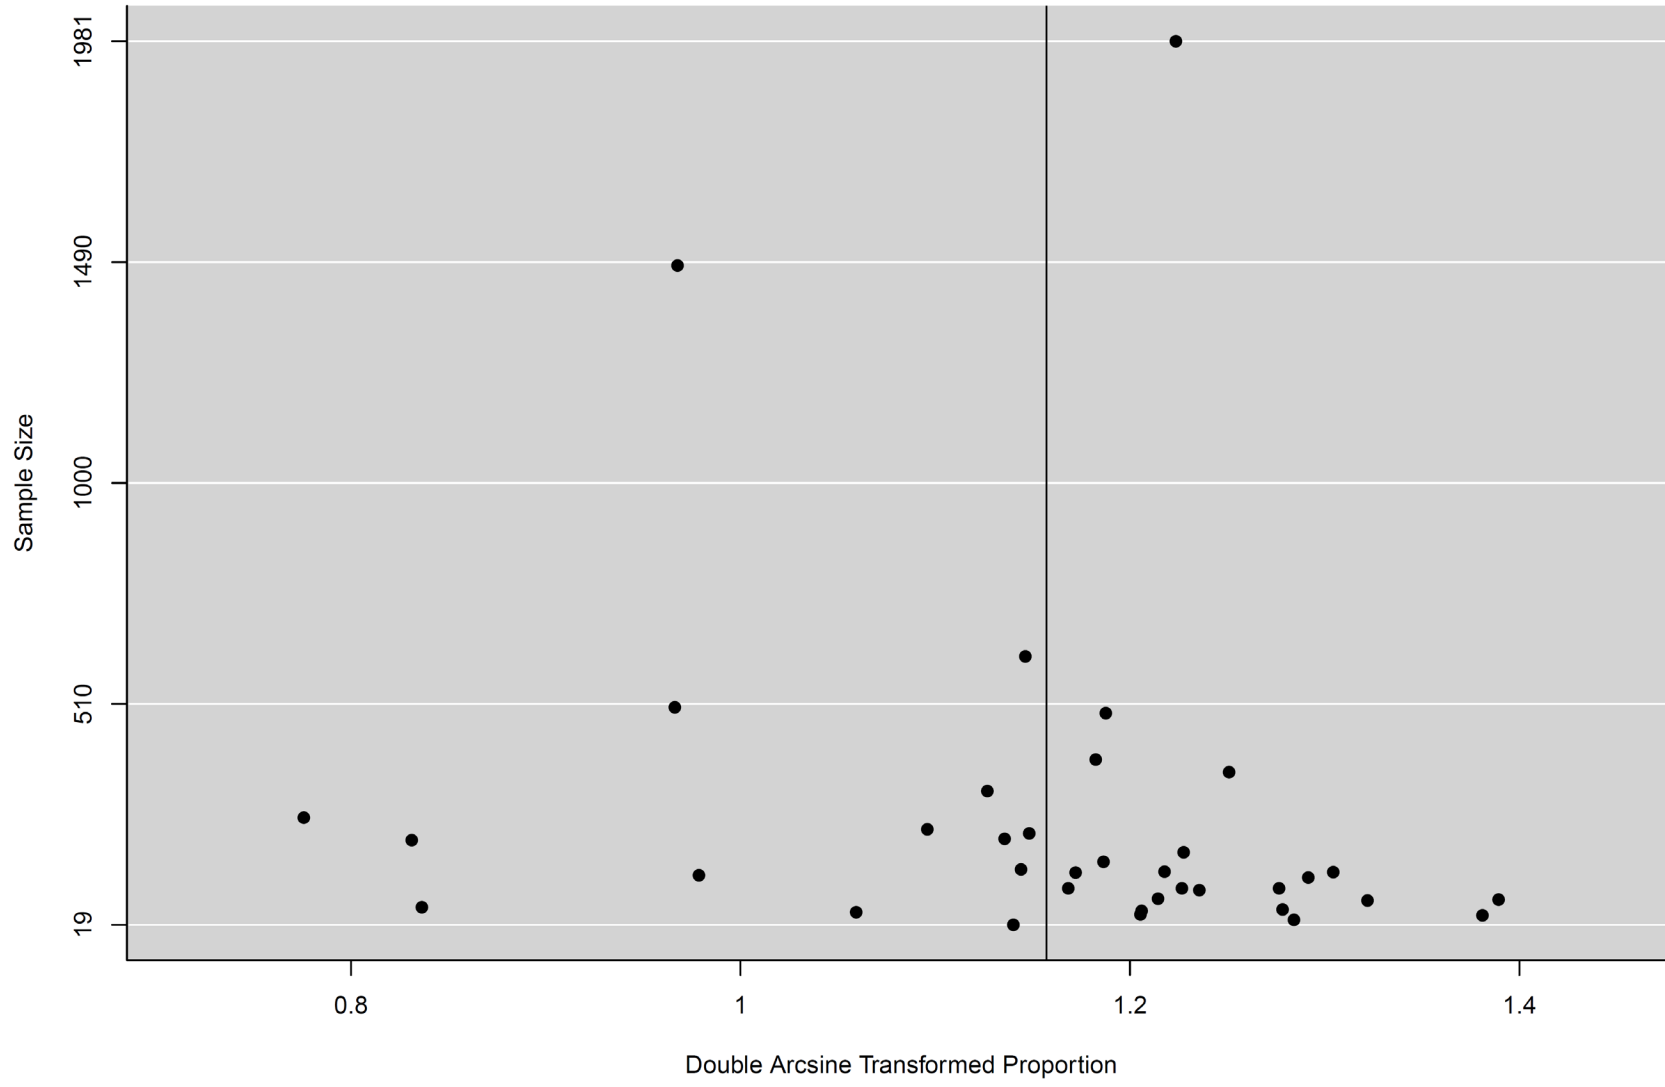

### 3d. Funnel plot sample size caregivers

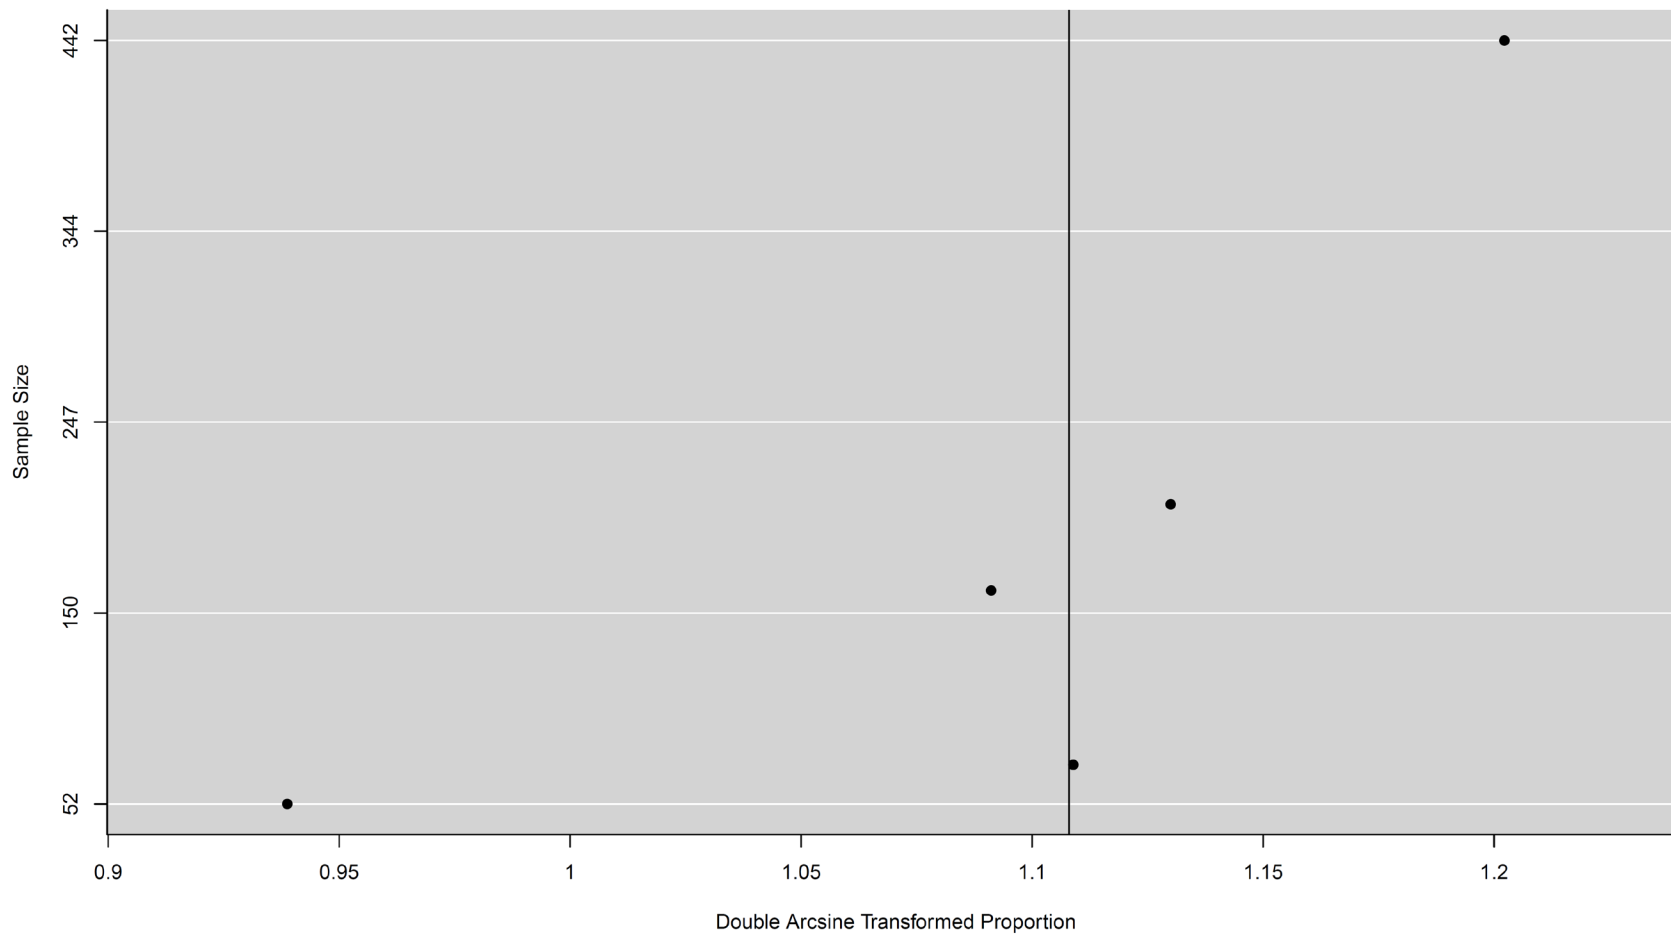

## References:

1. Anderson K. Minimising potentially inappropriate polypharmacy in community living older people: a multi-phase, mixed methods study to develop and pilot a general practitioner-led deprescribing intervention in primary care. 2018.
2. Anderson K, Freeman C, Foster M, Scott I. GP-Led Deprescribing in Community-Living Older Australians: An Exploratory Controlled Trial. *Journal of the American Geriatrics Society*. 2020;68(2):403-410.
3. Aoki T, Yamamoto Y, Ikenoue T, Fukuhara S. Factors associated with patient preferences towards deprescribing: a survey of adult patients on prescribed medications. *International Journal of Clinical Pharmacy*. 2019;41(2):531-537.
4. Candela M. Análisis de la complejidad farmacoterapéutica y la necesidad potencial de deprescripción en pacientes con infección por el VIH. *Proyecto de investigación*.. 2019.
5. Cross AJ, George J, Woodward MC, Le VJ, Elliott RA. Deprescribing potentially inappropriate medications in memory clinic patients (DePIMM): A feasibility study. *Research in Social and Administrative Pharmacy*. 2020.
6. Frankowski N, Grootens K, Van Der Stelt R, Noort A, Van Marum R. 'You tell me, you are the doctor'; Patients on long-term psychiatric residences about their medication. [Dutch]. *Tijdschrift voor Psychiatrie*. 2019;61(8):527-535.
7. Galazzi A, Lusignani M, Chiarelli MT, et al. Attitudes towards polypharmacy and medication withdrawal among older inpatients in Italy. *International Journal of Clinical Pharmacy*. 2016;38(2):454-461.
8. Gillespie R, Mullan J, Harrison L. Attitudes towards deprescribing and the influence of health literacy among older Australians. *Primary Health Care Research & Development*. 2019;20.
9. Goulding H. Quality Improvement project on optimising medications - serious mental illness. In: University of Pittsburg; 2018.
10. Hao LJ, Omar MS, Tohit N. Polypharmacy and willingness to deprescribe among elderly with chronic diseases. *International Journal of Gerontology*. 2018;12(4):340-343.
11. Hendrix I, Page AT, Korhonen MJ, et al. Patterns of High-Dose and Long-Term Proton Pump Inhibitor Use: A Cross-Sectional Study in Six South Australian Residential Aged Care Services. *Drugs - Real World Outcomes*. 2019;6(3):105-113.
12. Kalogianis MJ, Wimmer BC, Turner JP, et al. Are residents of aged care facilities willing to have their medications deprescribed? *Research in Social and Administrative Pharmacy*. 2016;12(5):784-788.
13. Ng WL, Tan MZW, Koh EYL, Tan NC. Deprescribing: What are the views and factors influencing this concept among patients with chronic diseases in a developed Asian community? *Proc Singapore Healthcare*. 2017;26(3):172-179.
14. Qi K, Reeve E, Hilmer SN, Pearson SA, Matthews S, Gnjjidic D. Older peoples' attitudes regarding polypharmacy, statin use and willingness to have statins deprescribed in Australia. *International Journal of Clinical Pharmacy*. 2015;37(5):949-957.
15. Reeve E. *Development and feasibility of a patient-centred deprescribing process / by Emily Reeve*, Thesis (PhD)-University of South Australia, 2014.; 2014.
16. Reeve E, Shakib S, Hendrix I, Roberts MS, Wiese MD. Development and validation of the patients' attitudes towards deprescribing (PATD) questionnaire. *International Journal of Clinical Pharmacy*. 2013;35(1):51-56.
17. Reeve E, Wiese MD, Hendrix I, Roberts MS, Shakib S. People's attitudes, beliefs, and experiences regarding polypharmacy and willingness to deprescribe. *Journal of the American Geriatrics Society*. 2013;61(9):1508-1514.
18. Saraswathy GR, Pratheeksha M, Maheswari E. Analysing the Attitude of Old Age Home Residents on Polypharmacy and Deprescribing of Medications in Mangalore, Karnataka. *Value in Health*. 2018;21 (Supplement 3):S220.
19. Schiøtz ML, Frølich A, Jensen AK, et al. Polypharmacy and medication deprescribing: A survey among multimorbid older adults in Denmark. *Pharmacol Res Perspect*. 2018;6(6).
20. Sirois C, Ouellet N, Reeve E. Community-dwelling older people's attitudes towards deprescribing in Canada. *Research In Social & Administrative Pharmacy*. 2017;13(4):864-870.
21. Turner JP, Martin P, Zhang YZ, Tannenbaum C. Patients beliefs and attitudes towards deprescribing: Can deprescribing success be predicted? *Research in Social and Administrative Pharmacy*. 2020;16(4):599-604.
22. UI Haq N, Mohaib M, Nasim A, Razaque G, Riaz S. Chronic patients attitudes, beliefs, and experiences regarding polypharmacy and willingness to deprescribe in Quetta. *Value in Health*. 2016;19 (7):A823.
23. Van Marum RJ, Van Marum S, Van Driesten S, Verdoorn S, Boxman A, Grossklaus A. Deprescribing for the elderly: Comparing opinions of patients, pharmacists and doctors. *Pharm Weekbl*. 2016;151(43):28-33.
24. Whitty R, Porter S, Battu K, et al. A pilot study of a Medication Rationalization (MERA) intervention. *CMAJ Open*. 2018;6(1):E87-E94.
25. Cardwell K, Smith SM, Clyne B, et al. Evaluation of the General Practice Pharmacist (GPP) intervention to optimise prescribing in Irish primary care: a non-randomised pilot study. *BMJ open*. 2020;10(6):e035087.
26. Edelman M, Blanker M, Jellema P, Hak E, Denig P. Patient attitudes towards deprescribing of alpha-blockers and willingness to participate in a discontinuation trial. *Neurology and Urodynamics*. 2017;36 (Supplement 3):S242-S244.
27. Edelman M, Jellema P, Hak E, Denig P, Blanker MH. Patients' Attitudes Towards Deprescribing Alpha-Blockers and Their Willingness to Participate in a Discontinuation Trial. *Drugs & aging*. 2019;36(12):1133-1139.

28. Gnjidic D, Ong HMM, Leung C, Jansen J, Reeve E. The impact of in hospital patient-education intervention on older people's attitudes and intention to have their benzodiazepines deprescribed: a feasibility study. *Therapeutic Advances in Drug Safety*. 2019;10.
29. Ikeji C, Williams A, Hennawi G, Brandt NJ. Patient and Provider Perspectives on Deprescribing Proton Pump Inhibitors. *J Gerontol Nurs*. 2019;45(10):9-17.
30. Ikeji CA, Brandt N, Hennawi G, Williams A. Patient and prescriber perspectives on proton pump inhibitor (PPI) use and deprescribing in older adults. *Journal of the American Geriatrics Society*. 2019;67 (Supplement 1):S287.
31. Kua CH, Reeve E, Ratnasingam V, Mak VSL, Lee SWH, Pharmaceutical Society of Singapore Deprescribing W. Patients' and Caregivers' Attitudes Towards Deprescribing in Singapore. *J Gerontol A Biol Sci Med Sci*. 2020;22:22.
32. Kua KP, Saw PS, Lee SWH. Attitudes towards deprescribing among multi-ethnic community-dwelling older patients and caregivers in Malaysia: a cross-sectional questionnaire study. A Comment. *International Journal of Clinical Pharmacy*. 2019;41(5):1131-1132.
33. Kua KP, Saw PS, Lee SWH. Attitudes towards deprescribing among multi-ethnic community-dwelling older patients and caregivers in Malaysia: a cross-sectional questionnaire study. *Int J Clin Pharm*. 2019;41(3):793-803.
34. Scott S, Clark A, Farrow C, et al. Attitudinal predictors of older peoples' and caregivers' desire to deprescribe in hospital. *BMC Geriatrics*. 2019;19(1).
35. Lundby C, Simonsen T, Ryg J, Sondergaard J, Pottegard A, Lauridsen HH. Translation, cultural adaptation, and psychometric properties of the Danish version of the revised Patients' attitudes towards Deprescribing questionnaire. *Pharmacoepidemiology and Drug Safety*. 2019;28 (Supplement 2):291-292.
36. Major GL, Mills A, Lowthian JA. Deprescribing Attitudes of Older Adults Receiving Medication Management Support From Home-Based Nurses. *Journal of the American Geriatrics Society*. 2019;67(8):1756-1757.
37. Martinez AI, Spencer J, Moloney M, Badour C, Reeve E, Moga DC. Attitudes toward deprescribing in a middle-aged health disparities population. *Research in Social and Administrative Pharmacy*. 2020.
38. Ng KY, Lee SWH. Attitude of older patients with Parkinson's disease towards deprescribing: A pilot study. *Journal of Parkinson's Disease*. 2019;9 (1):101.
39. Nusair MB, Arabyat R, Al-Azzam S, El-Hajji FD, Nusir AT, Al-Batineh M. Translation and psychometric properties of the Arabic version of the revised Patients' Attitudes Towards Deprescribing questionnaire. *J Pharm Health Serv Res*. 2020.
40. Omar MS, Ariandi AH, Tohit NM. Practical problems of medication use in the elderly Malaysians and their beliefs and attitudes toward deprescribing of medications. *Journal of research in pharmacy practice*. 2019;8(3):105.
41. Paque K. Balancing medication use in nursing home residents with life-limiting disease. *European journal of clinical pharmacology*. 2019.
42. Reeve E, Low LF, Hilmer SN. Attitudes of Older Adults and Caregivers in Australia toward Deprescribing. *Journal of the American Geriatrics Society*. 2019;67(6):1204-1210.
43. Reeve E, Low LF, Shakib S, Hilmer SN. Development and Validation of the Revised Patients' Attitudes Towards Deprescribing (rPATD) Questionnaire: Versions for Older Adults and Caregivers. *Drugs and Aging*. 2016;33(12):913-928.
44. Reeve E, Wolff JL, Skehan M, Bayliss EA, Hilmer SN, Boyd CM. Assessment of Attitudes Toward Deprescribing in Older Medicare Beneficiaries in the United States. *JAMA Internal Medicine*. 2018;178(12):1673-1680.
45. Reeve E, Anthony AC, Kouladjian O'Donnell L, et al. Development and pilot testing of the revised Patients' Attitudes Towards Deprescribing questionnaire for people with cognitive impairment. *Australasian journal on ageing*. 2018;37(4):E150-E154.
46. Tegegn HG, Tefera YG, Erku DA, et al. Older patients' perception of deprescribing in resource-limited settings: A cross-sectional study in an Ethiopia university hospital. *BMJ open*. 2018;8(4).
47. Qi K, Reeve E, Hilmer SN, Pearson SA, Matthews S, Gnjidic D. Older peoples' attitudes regarding polypharmacy, statin use and willingness to have statins deprescribed in Australia. *Int J Clin Pharm*. 2015;37(5):949-957.
48. Tegegn HG, Tefera YG, Erku DA, et al. Older patients' perception of deprescribing in resource-limited settings: a cross-sectional study in an Ethiopia university hospital. *BMJ open*. 2018;8(4):e020590.
49. Reeve E. *Development and feasibility of a patient-centred deprescribing process*. South Australia, Australia: School of Pharmacy and Medical Sciences, University of South Australia; 2014.
